# Supplementary material for: Anaerobic bacterial degradation of protein and lipid macromolecules in subarctic marine sediment
Source: PubMed Central journal article supplement (PMC8027456; doi:10.1038/s41396-020-00817-6), 2020-11-18
Supplement: 41396_2020_817_MOESM2_ESM.pdf [file 41396_2020_817_MOESM2_ESM.pdf]

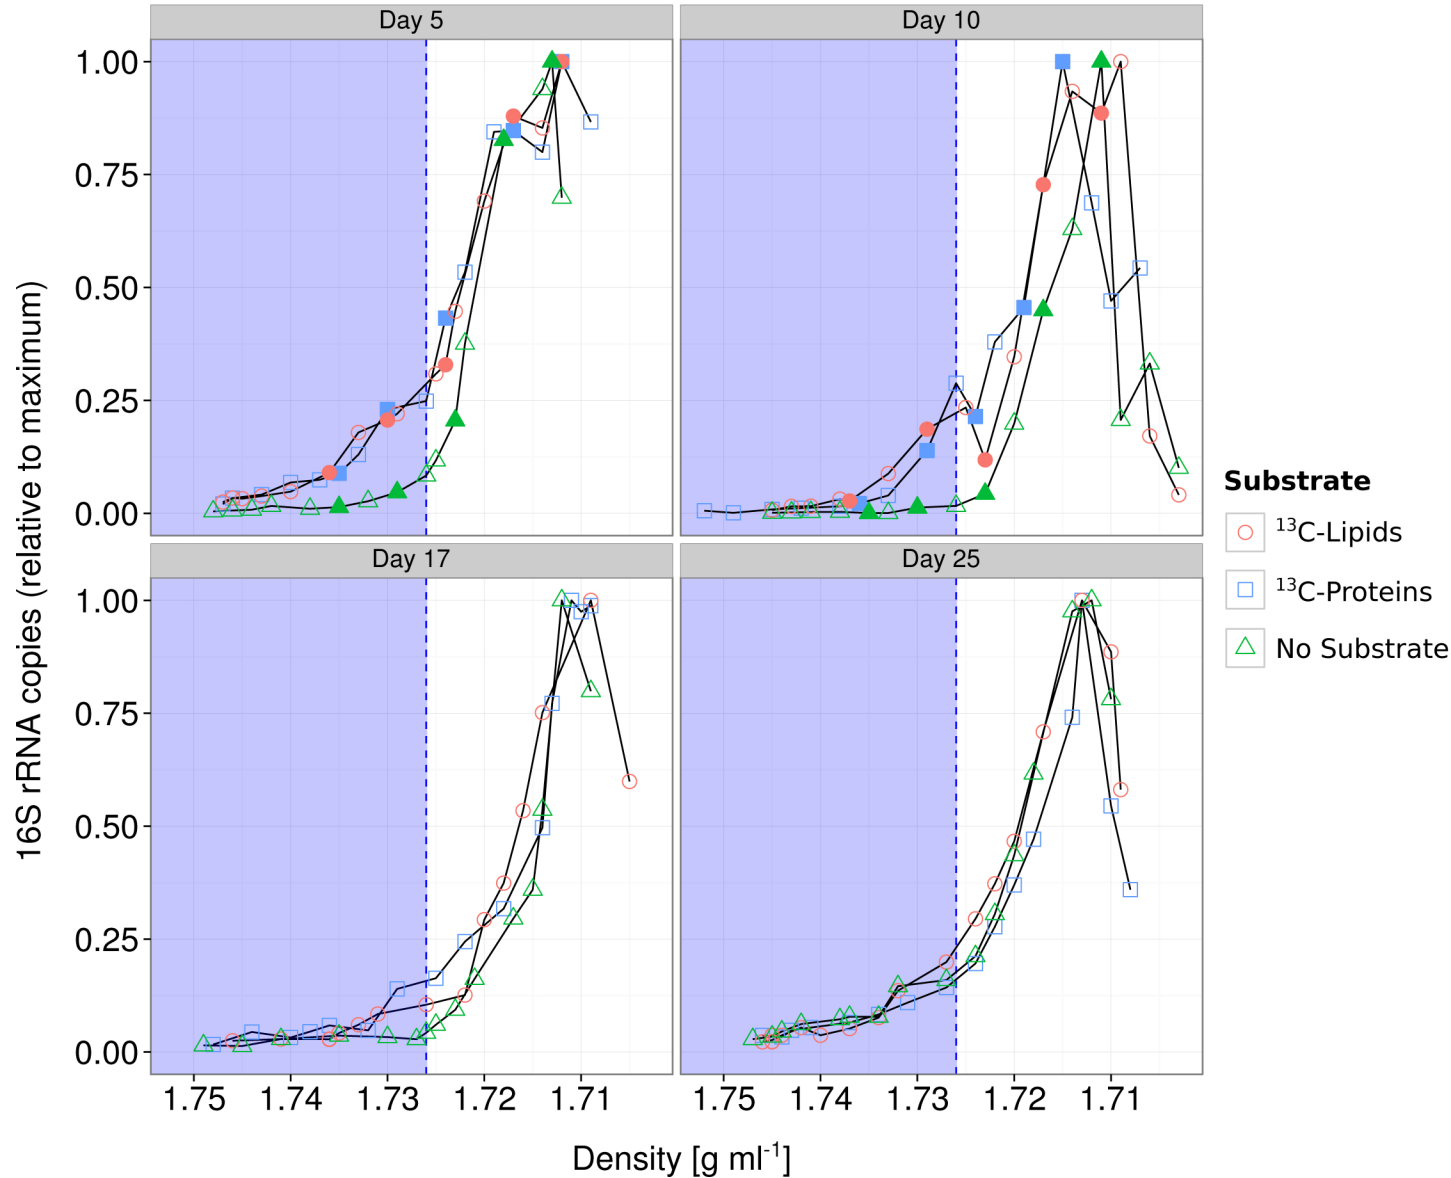

**Supplementary Figure S1. Proportions of 16S rRNA gene copies recovered from fractions of DNA-SIP gradients.** Color and shape of data points indicate the amended substrate. Filled symbols indicate that DNA from the respective fraction of the DNA-SIP gradient was used as template for amplicon sequencing. The blue shaded area indicates the density of the gradient above which <sup>13</sup>C-labelled DNA is expected to accumulate.
