# Supplementary material for: Anaerobic bacterial degradation of protein and lipid macromolecules in subarctic marine sediment
Source: PubMed Central journal article supplement (PMC8027456; doi:10.1038/s41396-020-00817-6), 2020-11-18
Supplement: 41396_2020_817_MOESM3_ESM.pdf [file 41396_2020_817_MOESM3_ESM.pdf]

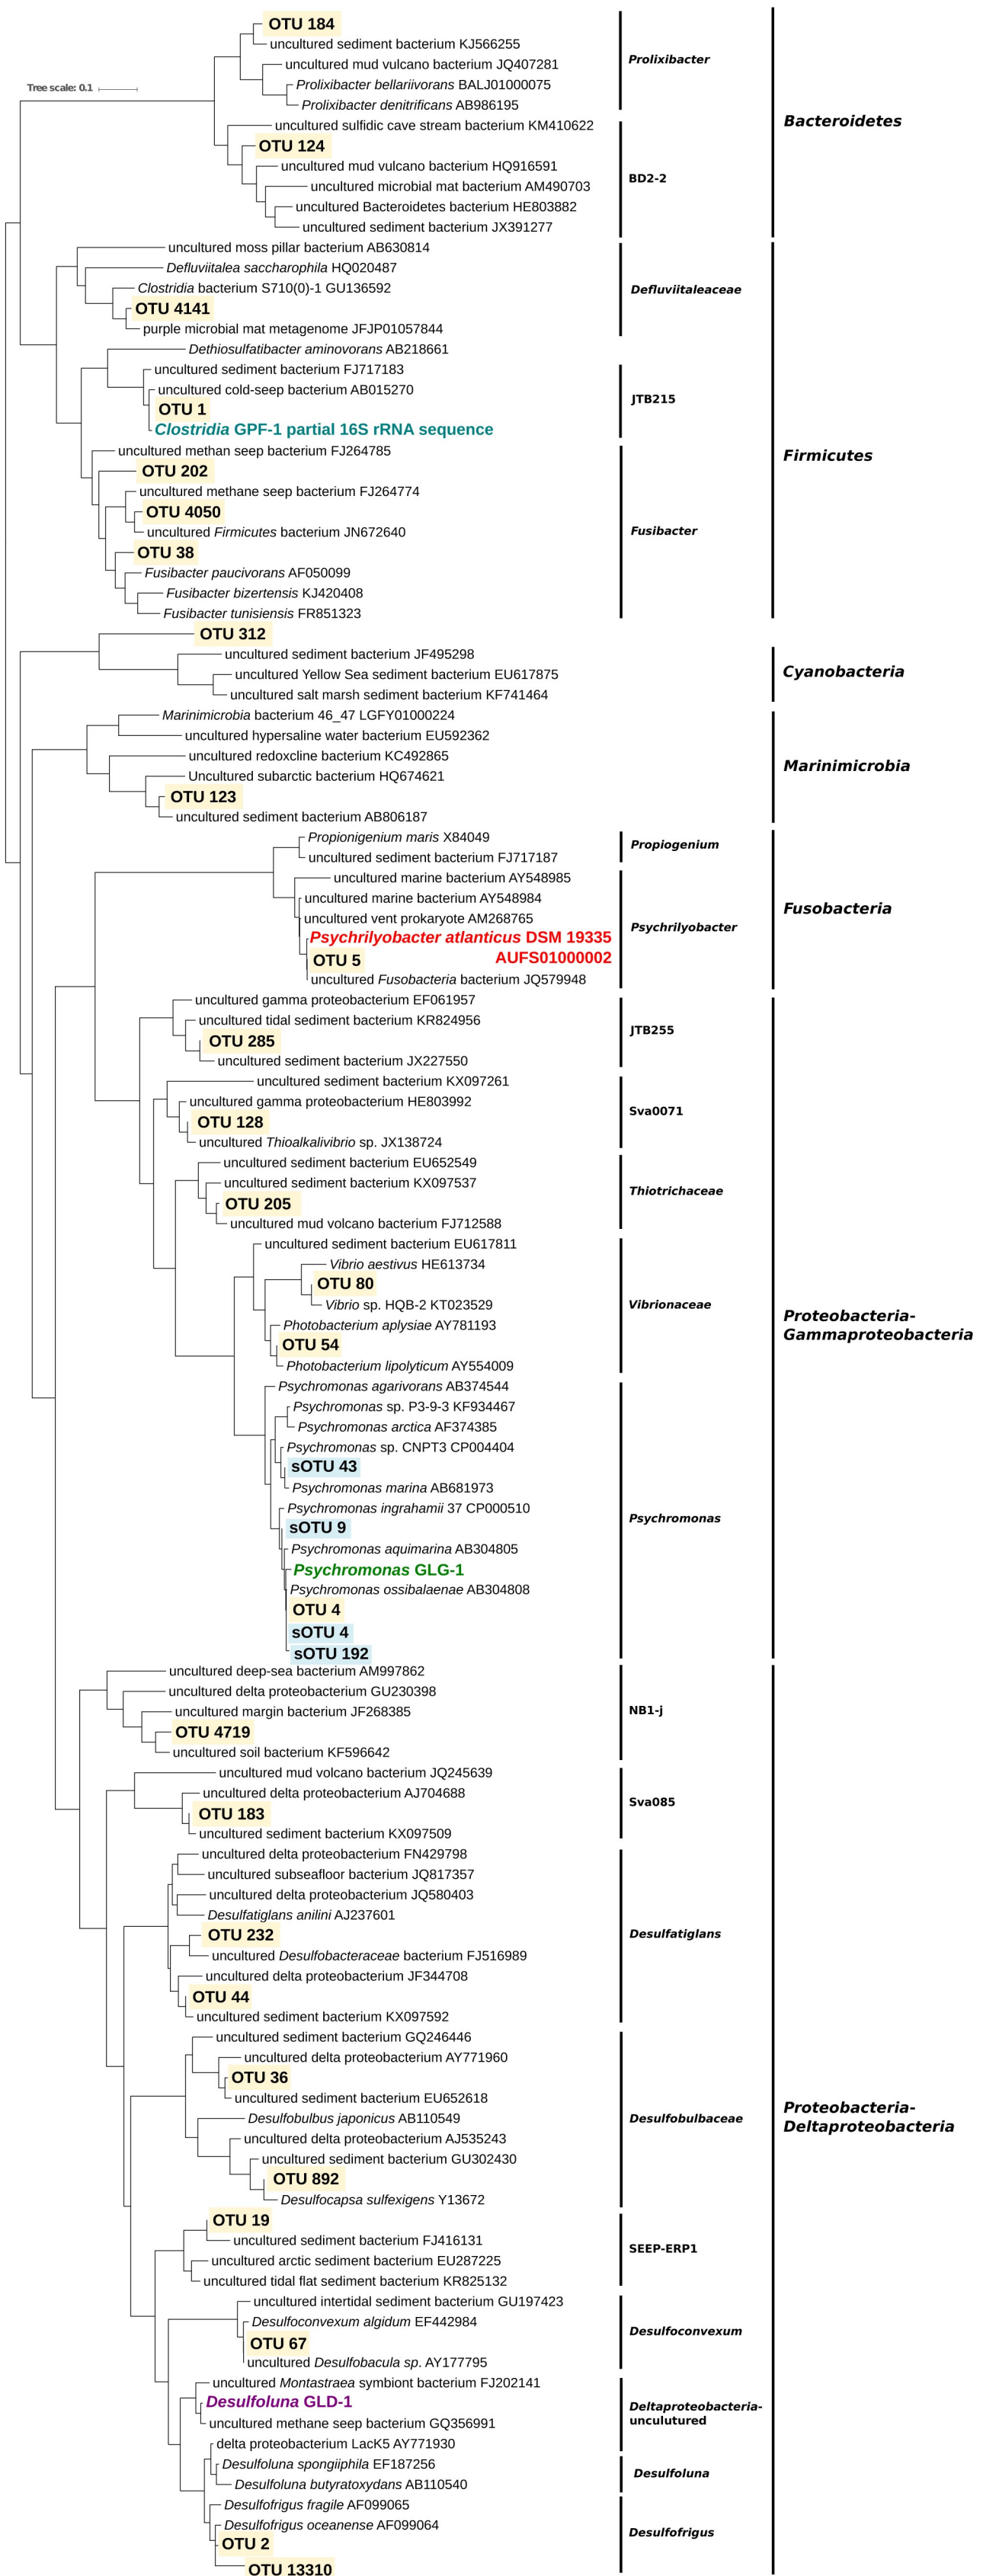

**Supplementary Figure S2.** Phylogenetic affiliation of 16S rRNA OTU sequences. The tree shows MAGs/genomes and  $^{13}\text{C}$ -labelled taxa determined by SIP in relation to close relatives derived from the SILVA database v.128. The color of leaves for the three MAGs and the type strain of *Psychrilyobacter atlanticus* were colored according to the respective color in Figures 4 and 5. The 16S rRNA OTUs and the four *Psychromonas* sub-OTUs were colored yellow and blue, respectively
