# Supplementary material for: Anaerobic bacterial degradation of protein and lipid macromolecules in subarctic marine sediment
Source: PubMed Central journal article supplement (PMC8027456; doi:10.1038/s41396-020-00817-6), 2020-11-18
Supplement: 41396_2020_817_MOESM4_ESM.pdf [file 41396_2020_817_MOESM4_ESM.pdf]

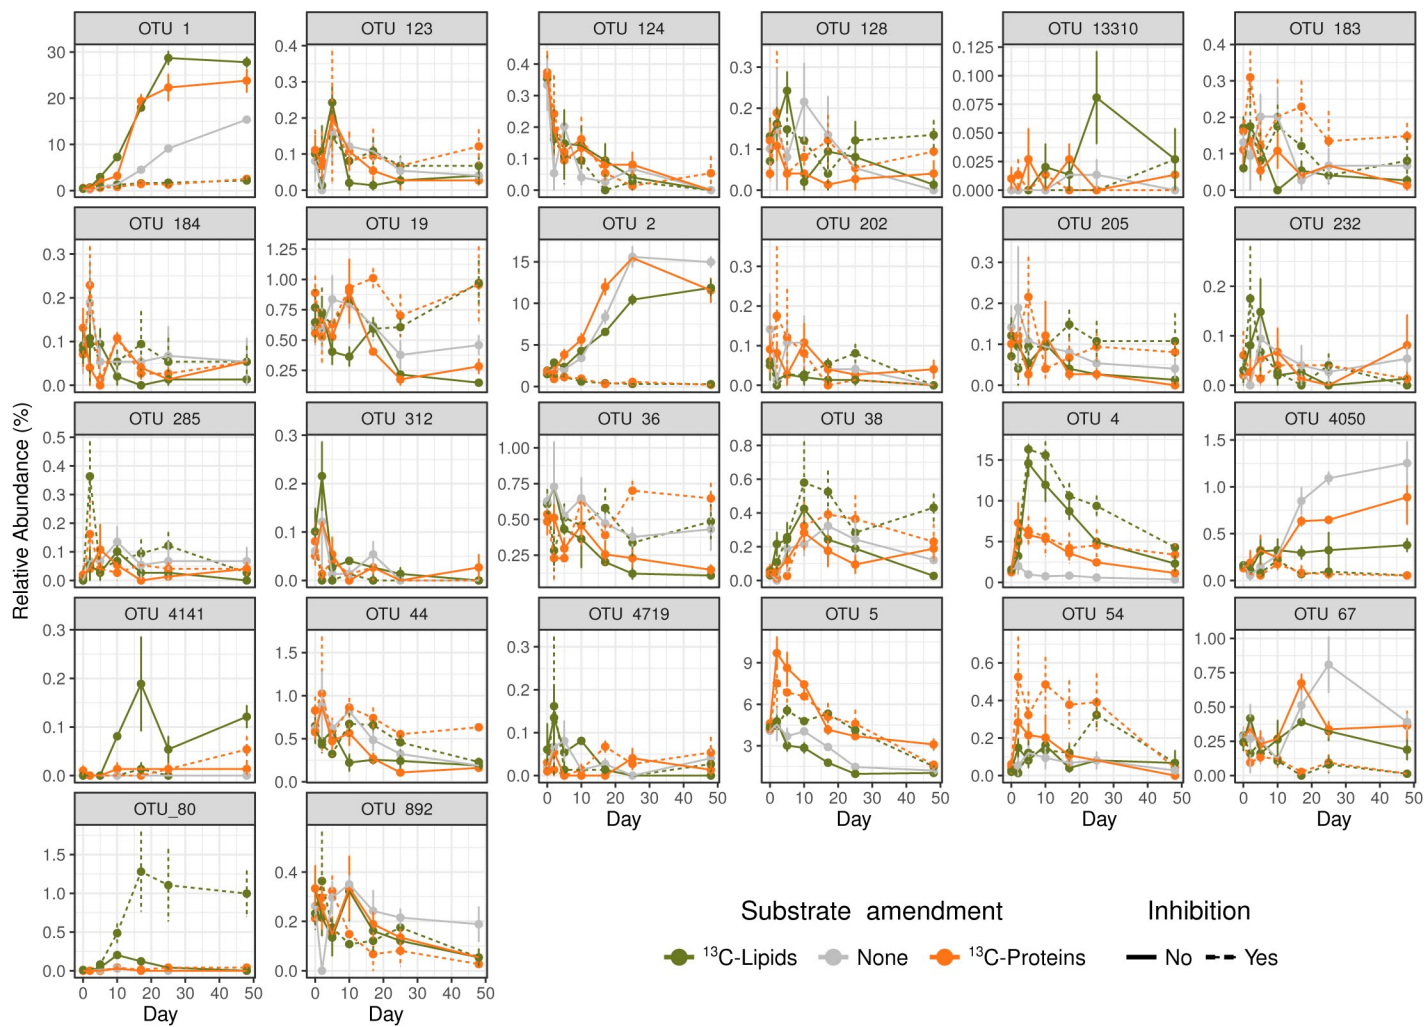

**Supplementary Figure S3.** Relative abundances of OTUs that incorporated  $^{13}\text{C}$ -carbon over-time in from anoxic sediment incubations amended with  $^{13}\text{C}$ -proteins or  $^{13}\text{C}$ -lipids and from unamended control incubations. OTUs presented correspond to those presented in Figure 2. Inhibition = microcosms where molybdate was added to inhibit sulfate reduction.
