# Supplementary material for: Anaerobic bacterial degradation of protein and lipid macromolecules in subarctic marine sediment
Source: PubMed Central journal article supplement (PMC8027456; doi:10.1038/s41396-020-00817-6), 2020-11-18
Supplement: 41396_2020_817_MOESM7_ESM.pdf [file 41396_2020_817_MOESM7_ESM.pdf]

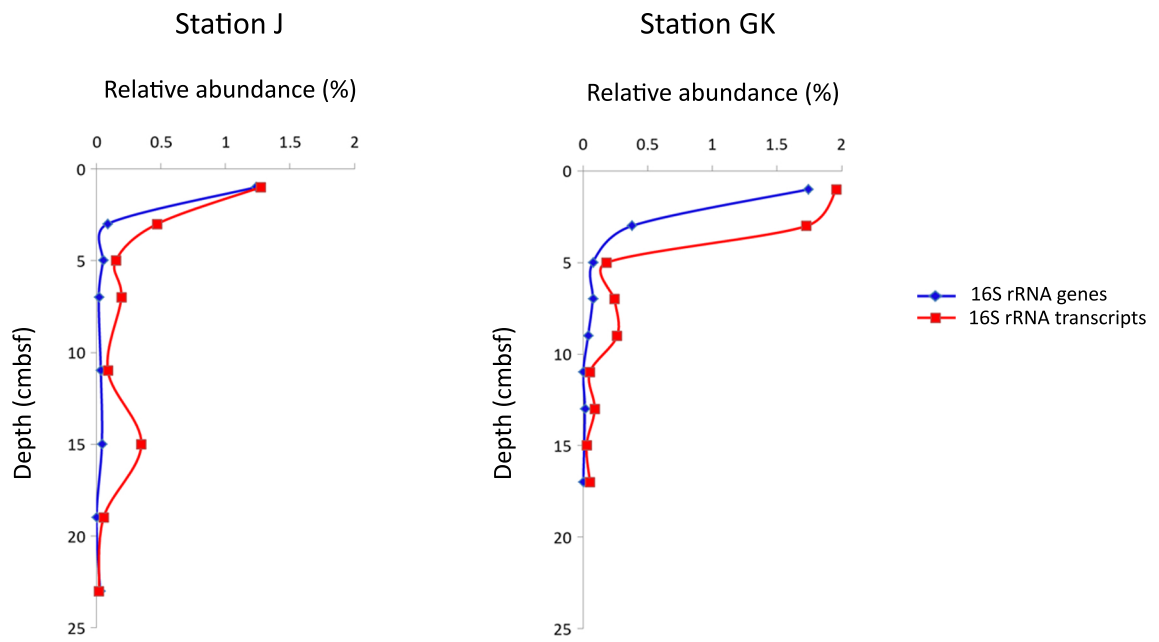

**Supplementary Figure S6.** Relative abundances of *Psychromonas* spp. in sediments of Smeerenbergfjord, Svalbard, as determined by 16S rRNA-gene and -transcript (cDNA) amplicon sequencing. Cmbsf = Centimeters below seafloor.
