# Supplementary material for: Anaerobic bacterial degradation of protein and lipid macromolecules in subarctic marine sediment
Source: PubMed Central journal article supplement (PMC8027456; doi:10.1038/s41396-020-00817-6), 2020-11-18
Supplement: 41396_2020_817_MOESM9_ESM.pdf [file 41396_2020_817_MOESM9_ESM.pdf]

**Supplementary Table S1. Summary of MEROPS and ESTHER database description for peptidases and lipases, respectively.**

| <b>Peptidases</b>                |                                                                                                                 |                                      |
|----------------------------------|-----------------------------------------------------------------------------------------------------------------|--------------------------------------|
| <b>MEROPS ID</b>                 | <b>MEROPS description summary</b>                                                                               | <b>Selected for further analyses</b> |
| A8                               | production of the bacterial cell wall                                                                           | No                                   |
| M1                               | some are cleaving amino acids from small peptides                                                               | Yes                                  |
| M3                               | Lactobacillus oligoendopeptidase cleaves oligopeptides                                                          | Yes                                  |
| M14                              | digestion of food and other functions                                                                           | Yes                                  |
| M20                              | conversion of proteins to free amino acids.                                                                     | Yes                                  |
| M24                              | removes N-terminal Methionine from protein                                                                      | Yes                                  |
| M28                              | alkaline phosphatase isozyme conversion                                                                         | No                                   |
| M29                              | catabolic peptidase in Streptococcus thermophilus                                                               | Yes                                  |
| M42                              | used by Lactobacillus for nutrition on milk-protein powder                                                      | Yes                                  |
| M48                              | degradation of abnormal proteins                                                                                | No                                   |
| M50                              | regulated intermembrane proetolysis                                                                             | No                                   |
| S8                               | probably involved in nutrition                                                                                  | Yes                                  |
| S12                              | synthesis and remodelling of bacterial cell walls                                                               | No                                   |
| S15                              | degradation of casein                                                                                           | Yes                                  |
| S24                              | regulatory stress response                                                                                      | No                                   |
| S26                              | remove the signal peptides and facilitate secretion                                                             | No                                   |
| <b>Lipases</b>                   |                                                                                                                 |                                      |
| <b>ESTHER family</b>             | <b>ESTHER description summary</b>                                                                               | <b>Selected for further analyses</b> |
| 6_AlphaBeta_hydrolase            | not well characterized                                                                                          | No                                   |
| Abhydrolase_7                    | acetyl-esterase_deacetylase or Dienelactone_hydrolase or xylan esterase                                         | No                                   |
| Bacterial_EstLip_FamX            | Family of Bacterial lipolytic enzymes                                                                           | Yes                                  |
| Carb_B_Bacteria                  | carboxylesterase, type B                                                                                        | Yes                                  |
| CarbLipBact_2                    | members of this group are esterases, lipases                                                                    | Yes                                  |
| Duf_1023                         | proteins of unknown function                                                                                    | No                                   |
| Duf_3089                         | lipolytic enzyme family defined from isolation and characterization of two esterases from a metagenomic library | Yes                                  |
| Duf_900                          | proteins of unknown function                                                                                    | No                                   |
| Epoxide_hydrolase                | conversion of epoxides to corresponding diols                                                                   | No                                   |
| GTSAGmotif                       | lipases from metagenomic library                                                                                | Yes                                  |
| Hormone-sensitive_lipase_like    | esterase/lipase, family IV                                                                                      | Yes                                  |
| Lipase_2                         | lipases                                                                                                         | Yes                                  |
| Lipase_3                         | lipases                                                                                                         | Yes                                  |
| Monoglyceridelipase_lysoospholip | has some homology to peptidases S33                                                                             | No                                   |
| NFM-deformylase                  | N-formylmaleamic acid to formic and maleamic acid                                                               | No                                   |
| PGAP1                            | attachment to proteins factor 1                                                                                 | No                                   |
