# Supplementary material for: Anaerobic bacterial degradation of protein and lipid macromolecules in subarctic marine sediment
Source: PubMed Central journal article supplement (PMC8027456; doi:10.1038/s41396-020-00817-6), 2020-11-18
Supplement: 41396_2020_817_MOESM10_ESM.pdf [file 41396_2020_817_MOESM10_ESM.pdf]

**Supplementary Table S2. Statistics results**

| Day    | Comparison                     | Compound        | p_value | adjusted_p_value |
|--------|--------------------------------|-----------------|---------|------------------|
| Day_0  | Proteins vs No_Substrate       | Formate_μM      | 1.000   | 1.000            |
| Day_2  | Proteins vs No_Substrate       | Formate_μM      | 0.043   | 0.107            |
| Day_5  | Proteins vs No_Substrate       | Formate_μM      | 0.483   | 0.594            |
| Day_10 | Proteins vs No_Substrate       | Formate_μM      | 0.401   | 0.515            |
| Day_17 | Proteins vs No_Substrate       | Formate_μM      | 0.247   | 0.349            |
| Day_0  | Proteins vs No_Substrate       | Acetate_μM      | 1.000   | 1.000            |
| Day_2  | Proteins vs No_Substrate       | Acetate_μM      | 0.009   | 0.035            |
| Day_5  | Proteins vs No_Substrate       | Acetate_μM      | 0.005   | 0.022            |
| Day_10 | Proteins vs No_Substrate       | Acetate_μM      | 0.036   | 0.094            |
| Day_17 | Proteins vs No_Substrate       | Acetate_μM      | 0.097   | 0.185            |
| Day_0  | Proteins vs No_Substrate       | Propionate_μM   | 1.000   | 1.000            |
| Day_2  | Proteins vs No_Substrate       | Propionate_μM   | 0.010   | 0.036            |
| Day_5  | Proteins vs No_Substrate       | Propionate_μM   | 0.000   | 0.002            |
| Day_10 | Proteins vs No_Substrate       | Propionate_μM   | 0.223   | 0.321            |
| Day_17 | Proteins vs No_Substrate       | Propionate_μM   | 0.018   | 0.054            |
| Day_0  | Proteins vs No_Substrate       | Butyrate_μM     | NaN     | NaN              |
| Day_2  | Proteins vs No_Substrate       | Butyrate_μM     | 0.010   | 0.035            |
| Day_5  | Proteins vs No_Substrate       | Butyrate_μM     | 0.003   | 0.018            |
| Day_10 | Proteins vs No_Substrate       | Butyrate_μM     | 0.598   | 0.721            |
| Day_17 | Proteins vs No_Substrate       | Butyrate_μM     | 0.137   | 0.232            |
| Day_0  | Proteins vs No_Substrate       | iso.Butyrate_μM | NaN     | NaN              |
| Day_2  | Proteins vs No_Substrate       | iso.Butyrate_μM | 0.003   | 0.017            |
| Day_5  | Proteins vs No_Substrate       | iso.Butyrate_μM | 0.005   | 0.022            |
| Day_10 | Proteins vs No_Substrate       | iso.Butyrate_μM | 0.000   | 0.004            |
| Day_17 | Proteins vs No_Substrate       | iso.Butyrate_μM | 0.067   | 0.146            |
| Day_0  | Proteins vs No_Substrate       | Lactate_μM      | NaN     | NaN              |
| Day_2  | Proteins vs No_Substrate       | Lactate_μM      | NaN     | NaN              |
| Day_5  | Proteins vs No_Substrate       | Lactate_μM      | NaN     | NaN              |
| Day_10 | Proteins vs No_Substrate       | Lactate_μM      | NaN     | NaN              |
| Day_17 | Proteins vs No_Substrate       | Lactate_μM      | NaN     | NaN              |
| Day_0  | Proteins vs Proteins_inhibited | Formate_μM      | 1.000   | 1.000            |
| Day_2  | Proteins vs Proteins_inhibited | Formate_μM      | 0.341   | 0.448            |
| Day_5  | Proteins vs Proteins_inhibited | Formate_μM      | 0.161   | 0.258            |
| Day_10 | Proteins vs Proteins_inhibited | Formate_μM      | 0.191   | 0.283            |
| Day_17 | Proteins vs Proteins_inhibited | Formate_μM      | 0.440   | 0.556            |
| Day_0  | Proteins vs Proteins_inhibited | Acetate_μM      | 1.000   | 1.000            |
| Day_2  | Proteins vs Proteins_inhibited | Acetate_μM      | 0.132   | 0.225            |
| Day_5  | Proteins vs Proteins_inhibited | Acetate_μM      | 0.001   | 0.010            |
| Day_10 | Proteins vs Proteins_inhibited | Acetate_μM      | 0.000   | 0.004            |
| Day_17 | Proteins vs Proteins_inhibited | Acetate_μM      | 0.015   | 0.047            |
| Day_0  | Proteins vs Proteins_inhibited | Propionate_μM   | 1.000   | 1.000            |
| Day_2  | Proteins vs Proteins_inhibited | Propionate_μM   | 0.005   | 0.022            |
| Day_5  | Proteins vs Proteins_inhibited | Propionate_μM   | 0.001   | 0.010            |
| Day_10 | Proteins vs Proteins_inhibited | Propionate_μM   | 0.005   | 0.022            |
| Day_17 | Proteins vs Proteins_inhibited | Propionate_μM   | 0.001   | 0.010            |
| Day_0  | Proteins vs Proteins_inhibited | Butyrate_μM     | NaN     | NaN              |
| Day_2  | Proteins vs Proteins_inhibited | Butyrate_μM     | 0.628   | 0.741            |
| Day_5  | Proteins vs Proteins_inhibited | Butyrate_μM     | 0.044   | 0.107            |
| Day_10 | Proteins vs Proteins_inhibited | Butyrate_μM     | 0.047   | 0.110            |
| Day_17 | Proteins vs Proteins_inhibited | Butyrate_μM     | 0.098   | 0.185            |
| Day_0  | Proteins vs Proteins_inhibited | iso.Butyrate_μM | NaN     | NaN              |
| Day_2  | Proteins vs Proteins_inhibited | iso.Butyrate_μM | 0.032   | 0.090            |
| Day_5  | Proteins vs Proteins_inhibited | iso.Butyrate_μM | 0.085   | 0.173            |
| Day_10 | Proteins vs Proteins_inhibited | iso.Butyrate_μM | 0.851   | 0.980            |
| Day_17 | Proteins vs Proteins_inhibited | iso.Butyrate_μM | 0.162   | 0.258            |
| Day_0  | Proteins vs Proteins_inhibited | Lactate_μM      | NaN     | NaN              |
| Day_2  | Proteins vs Proteins_inhibited | Lactate_μM      | NaN     | NaN              |
| Day_5  | Proteins vs Proteins_inhibited | Lactate_μM      | NaN     | NaN              |
| Day_10 | Proteins vs Proteins_inhibited | Lactate_μM      | NaN     | NaN              |

|        |                                    |                 |       |       |
|--------|------------------------------------|-----------------|-------|-------|
| Day_17 | Proteins vs Proteins_inhibited     | Lactate_μM      | NaN   | NaN   |
| Day_0  | Proteins_inhibited vs No Substrate | Formate_μM      | 1.000 | 1.000 |
| Day_2  | Proteins_inhibited vs No Substrate | Formate_μM      | 0.183 | 0.276 |
| Day_5  | Proteins_inhibited vs No Substrate | Formate_μM      | 0.157 | 0.258 |
| Day_10 | Proteins_inhibited vs No Substrate | Formate_μM      | 0.200 | 0.293 |
| Day_17 | Proteins_inhibited vs No Substrate | Formate_μM      | 0.174 | 0.272 |
| Day_0  | Proteins_inhibited vs No Substrate | Acetate_μM      | 1.000 | 1.000 |
| Day_2  | Proteins_inhibited vs No Substrate | Acetate_μM      | 0.481 | 0.594 |
| Day_5  | Proteins_inhibited vs No Substrate | Acetate_μM      | 0.037 | 0.096 |
| Day_10 | Proteins_inhibited vs No Substrate | Acetate_μM      | 0.113 | 0.209 |
| Day_17 | Proteins_inhibited vs No Substrate | Acetate_μM      | 0.083 | 0.173 |
| Day_0  | Proteins_inhibited vs No Substrate | Propionate_μM   | 1.000 | 1.000 |
| Day_2  | Proteins_inhibited vs No Substrate | Propionate_μM   | 0.601 | 0.721 |
| Day_5  | Proteins_inhibited vs No Substrate | Propionate_μM   | 0.052 | 0.117 |
| Day_10 | Proteins_inhibited vs No Substrate | Propionate_μM   | 0.393 | 0.509 |
| Day_17 | Proteins_inhibited vs No Substrate | Propionate_μM   | 0.109 | 0.204 |
| Day_0  | Proteins_inhibited vs No Substrate | Butyrate_μM     | NaN   | NaN   |
| Day_2  | Proteins_inhibited vs No Substrate | Butyrate_μM     | 0.049 | 0.115 |
| Day_5  | Proteins_inhibited vs No Substrate | Butyrate_μM     | 0.036 | 0.094 |
| Day_10 | Proteins_inhibited vs No Substrate | Butyrate_μM     | 0.046 | 0.110 |
| Day_17 | Proteins_inhibited vs No Substrate | Butyrate_μM     | 0.056 | 0.124 |
| Day_0  | Proteins_inhibited vs No Substrate | iso.Butyrate_μM | NaN   | NaN   |
| Day_2  | Proteins_inhibited vs No Substrate | iso.Butyrate_μM | 0.084 | 0.173 |
| Day_5  | Proteins_inhibited vs No Substrate | iso.Butyrate_μM | 0.028 | 0.081 |
| Day_10 | Proteins_inhibited vs No Substrate | iso.Butyrate_μM | 0.087 | 0.173 |
| Day_17 | Proteins_inhibited vs No Substrate | iso.Butyrate_μM | 0.089 | 0.173 |
| Day_0  | Proteins_inhibited vs No Substrate | Lactate_μM      | NaN   | NaN   |
| Day_2  | Proteins_inhibited vs No Substrate | Lactate_μM      | NaN   | NaN   |
| Day_5  | Proteins_inhibited vs No Substrate | Lactate_μM      | NaN   | NaN   |
| Day_10 | Proteins_inhibited vs No Substrate | Lactate_μM      | NaN   | NaN   |
| Day_17 | Proteins_inhibited vs No Substrate | Lactate_μM      | NaN   | NaN   |
| Day_0  | Lipids vs No_Substrate             | Formate_μM      | 1.000 | 1.000 |
| Day_2  | Lipids vs No_Substrate             | Formate_μM      | 0.163 | 0.258 |
| Day_5  | Lipids vs No_Substrate             | Formate_μM      | 0.271 | 0.372 |
| Day_10 | Lipids vs No_Substrate             | Formate_μM      | 0.342 | 0.448 |
| Day_17 | Lipids vs No_Substrate             | Formate_μM      | 0.284 | 0.382 |
| Day_0  | Lipids vs No_Substrate             | Acetate_μM      | 1.000 | 1.000 |
| Day_2  | Lipids vs No_Substrate             | Acetate_μM      | 0.119 | 0.211 |
| Day_5  | Lipids vs No_Substrate             | Acetate_μM      | 0.127 | 0.220 |
| Day_10 | Lipids vs No_Substrate             | Acetate_μM      | 0.114 | 0.209 |
| Day_17 | Lipids vs No_Substrate             | Acetate_μM      | 0.444 | 0.556 |
| Day_0  | Lipids vs No_Substrate             | Propionate_μM   | 1.000 | 1.000 |
| Day_2  | Lipids vs No_Substrate             | Propionate_μM   | 0.036 | 0.094 |
| Day_5  | Lipids vs No_Substrate             | Propionate_μM   | 0.159 | 0.258 |
| Day_10 | Lipids vs No_Substrate             | Propionate_μM   | 0.270 | 0.372 |
| Day_17 | Lipids vs No_Substrate             | Propionate_μM   | 0.085 | 0.173 |
| Day_0  | Lipids vs No_Substrate             | Butyrate_μM     | NaN   | NaN   |
| Day_2  | Lipids vs No_Substrate             | Butyrate_μM     | 0.042 | 0.107 |
| Day_5  | Lipids vs No_Substrate             | Butyrate_μM     | 0.002 | 0.014 |
| Day_10 | Lipids vs No_Substrate             | Butyrate_μM     | 0.016 | 0.051 |
| Day_17 | Lipids vs No_Substrate             | Butyrate_μM     | 0.018 | 0.054 |
| Day_0  | Lipids vs No_Substrate             | iso.Butyrate_μM | NaN   | NaN   |
| Day_2  | Lipids vs No_Substrate             | iso.Butyrate_μM | 0.017 | 0.053 |
| Day_5  | Lipids vs No_Substrate             | iso.Butyrate_μM | 0.013 | 0.044 |
| Day_10 | Lipids vs No_Substrate             | iso.Butyrate_μM | 0.002 | 0.015 |
| Day_17 | Lipids vs No_Substrate             | iso.Butyrate_μM | 0.008 | 0.033 |
| Day_0  | Lipids vs No_Substrate             | Lactate_μM      | NaN   | NaN   |
| Day_2  | Lipids vs No_Substrate             | Lactate_μM      | NaN   | NaN   |
| Day_5  | Lipids vs No_Substrate             | Lactate_μM      | NaN   | NaN   |
| Day_10 | Lipids vs No_Substrate             | Lactate_μM      | NaN   | NaN   |
| Day_17 | Lipids vs No_Substrate             | Lactate_μM      | NaN   | NaN   |
| Day_0  | Lipids vs Lipids_inhibited         | Formate_μM      | 1.000 | 1.000 |

|        |                                  |                 |       |       |
|--------|----------------------------------|-----------------|-------|-------|
| Day_2  | Lipids vs Lipids_inhibited       | Formate_μM      | 0.235 | 0.335 |
| Day_5  | Lipids vs Lipids_inhibited       | Formate_μM      | 0.001 | 0.010 |
| Day_10 | Lipids vs Lipids_inhibited       | Formate_μM      | 0.003 | 0.018 |
| Day_17 | Lipids vs Lipids_inhibited       | Formate_μM      | 0.000 | 0.004 |
| Day_0  | Lipids vs Lipids_inhibited       | Acetate_μM      | 1.000 | 1.000 |
| Day_2  | Lipids vs Lipids_inhibited       | Acetate_μM      | 0.119 | 0.211 |
| Day_5  | Lipids vs Lipids_inhibited       | Acetate_μM      | 0.074 | 0.159 |
| Day_10 | Lipids vs Lipids_inhibited       | Acetate_μM      | 0.000 | 0.002 |
| Day_17 | Lipids vs Lipids_inhibited       | Acetate_μM      | 0.011 | 0.036 |
| Day_0  | Lipids vs Lipids_inhibited       | Propionate_μM   | 1.000 | 1.000 |
| Day_2  | Lipids vs Lipids_inhibited       | Propionate_μM   | 0.259 | 0.362 |
| Day_5  | Lipids vs Lipids_inhibited       | Propionate_μM   | 0.295 | 0.394 |
| Day_10 | Lipids vs Lipids_inhibited       | Propionate_μM   | 0.052 | 0.117 |
| Day_17 | Lipids vs Lipids_inhibited       | Propionate_μM   | 0.120 | 0.211 |
| Day_0  | Lipids vs Lipids_inhibited       | Butyrate_μM     | NaN   | NaN   |
| Day_2  | Lipids vs Lipids_inhibited       | Butyrate_μM     | 0.994 | 1.000 |
| Day_5  | Lipids vs Lipids_inhibited       | Butyrate_μM     | 0.001 | 0.010 |
| Day_10 | Lipids vs Lipids_inhibited       | Butyrate_μM     | 0.002 | 0.015 |
| Day_17 | Lipids vs Lipids_inhibited       | Butyrate_μM     | 0.001 | 0.010 |
| Day_0  | Lipids vs Lipids_inhibited       | iso.Butyrate_μM | NaN   | NaN   |
| Day_2  | Lipids vs Lipids_inhibited       | iso.Butyrate_μM | 0.223 | 0.321 |
| Day_5  | Lipids vs Lipids_inhibited       | iso.Butyrate_μM | 0.009 | 0.034 |
| Day_10 | Lipids vs Lipids_inhibited       | iso.Butyrate_μM | 0.001 | 0.010 |
| Day_17 | Lipids vs Lipids_inhibited       | iso.Butyrate_μM | 0.013 | 0.042 |
| Day_0  | Lipids vs Lipids_inhibited       | Lactate_μM      | NaN   | NaN   |
| Day_2  | Lipids vs Lipids_inhibited       | Lactate_μM      | 0.184 | 0.276 |
| Day_5  | Lipids vs Lipids_inhibited       | Lactate_μM      | 0.004 | 0.020 |
| Day_10 | Lipids vs Lipids_inhibited       | Lactate_μM      | 0.004 | 0.021 |
| Day_17 | Lipids vs Lipids_inhibited       | Lactate_μM      | NaN   | NaN   |
| Day_0  | Lipids_inhibited vs No Substrate | Formate_μM      | 1.000 | 1.000 |
| Day_2  | Lipids_inhibited vs No Substrate | Formate_μM      | 0.184 | 0.276 |
| Day_5  | Lipids_inhibited vs No Substrate | Formate_μM      | 0.001 | 0.010 |
| Day_10 | Lipids_inhibited vs No Substrate | Formate_μM      | 0.003 | 0.018 |
| Day_17 | Lipids_inhibited vs No Substrate | Formate_μM      | 0.001 | 0.010 |
| Day_0  | Lipids_inhibited vs No Substrate | Acetate_μM      | 1.000 | 1.000 |
| Day_2  | Lipids_inhibited vs No Substrate | Acetate_μM      | 0.436 | 0.556 |
| Day_5  | Lipids_inhibited vs No Substrate | Acetate_μM      | 0.033 | 0.091 |
| Day_10 | Lipids_inhibited vs No Substrate | Acetate_μM      | 0.163 | 0.258 |
| Day_17 | Lipids_inhibited vs No Substrate | Acetate_μM      | 0.089 | 0.173 |
| Day_0  | Lipids_inhibited vs No Substrate | Propionate_μM   | 1.000 | 1.000 |
| Day_2  | Lipids_inhibited vs No Substrate | Propionate_μM   | 0.635 | 0.744 |
| Day_5  | Lipids_inhibited vs No Substrate | Propionate_μM   | 0.000 | 0.004 |
| Day_10 | Lipids_inhibited vs No Substrate | Propionate_μM   | 0.720 | 0.836 |
| Day_17 | Lipids_inhibited vs No Substrate | Propionate_μM   | 0.533 | 0.650 |
| Day_0  | Lipids_inhibited vs No Substrate | Butyrate_μM     | NaN   | NaN   |
| Day_2  | Lipids_inhibited vs No Substrate | Butyrate_μM     | 0.279 | 0.380 |
| Day_5  | Lipids_inhibited vs No Substrate | Butyrate_μM     | 0.001 | 0.010 |
| Day_10 | Lipids_inhibited vs No Substrate | Butyrate_μM     | 0.002 | 0.016 |
| Day_17 | Lipids_inhibited vs No Substrate | Butyrate_μM     | 0.002 | 0.016 |
| Day_0  | Lipids_inhibited vs No Substrate | iso.Butyrate_μM | NaN   | NaN   |
| Day_2  | Lipids_inhibited vs No Substrate | iso.Butyrate_μM | 0.610 | 0.726 |
| Day_5  | Lipids_inhibited vs No Substrate | iso.Butyrate_μM | 0.007 | 0.029 |
| Day_10 | Lipids_inhibited vs No Substrate | iso.Butyrate_μM | 0.000 | 0.007 |
| Day_17 | Lipids_inhibited vs No Substrate | iso.Butyrate_μM | 0.009 | 0.033 |
| Day_0  | Lipids_inhibited vs No Substrate | Lactate_μM      | NaN   | NaN   |
| Day_2  | Lipids_inhibited vs No Substrate | Lactate_μM      | 0.184 | 0.276 |
| Day_5  | Lipids_inhibited vs No Substrate | Lactate_μM      | 0.004 | 0.020 |
| Day_10 | Lipids_inhibited vs No Substrate | Lactate_μM      | 0.004 | 0.021 |
| Day_17 | Lipids_inhibited vs No Substrate | Lactate_μM      | NaN   | NaN   |
