# Supplementary material for: Anaerobic bacterial degradation of protein and lipid macromolecules in subarctic marine sediment
Source: PubMed Central journal article supplement (PMC8027456; doi:10.1038/s41396-020-00817-6), 2020-11-18
Supplement: 41396_2020_817_MOESM11_ESM.pdf [file 41396_2020_817_MOESM11_ESM.pdf]

Supplementary Table S3. Significant enrichment of 16S rRNA gene OTUs in <sup>13</sup>C fractions of DNA stable isotope gradients.

| OTU       | Taxonomy                                             | base mean | log2-fold change | adjusted p-value | Treatment | Day |
|-----------|------------------------------------------------------|-----------|------------------|------------------|-----------|-----|
| OTU_80    | <i>Gammaproteobacteria</i> , <i>Vibrionaceae</i>     | 8.7       | 7.7              | 0.000            | Proteins  | 10  |
| OTU_80    | <i>Gammaproteobacteria</i> , <i>Vibrionaceae</i>     | 8.7       | 6.7              | 0.002            | Lipids    | 5   |
| OTU_232   | <i>Deltaproteobacteria</i> , <i>Desulfatiglans</i>   | 2.4       | 6.4              | 0.005            | Proteins  | 10  |
| OTU_4     | <i>Gammaproteobacteria</i> , <i>Psychromonas</i>     | 936.5     | 5.5              | 0.000            | Lipids    | 5   |
| OTU_312   | <i>Cyanobacteria</i>                                 | 1.9       | 5.2              | 0.034            | Proteins  | 10  |
| OTU_4     | <i>Gammaproteobacteria</i> , <i>Psychromonas</i>     | 936.5     | 4.9              | 0.000            | Lipids    | 10  |
| OTU_4141  | <i>Firmicutes</i> , <i>Defluviitaleaceae</i>         | 5.2       | 4.8              | 0.015            | Lipids    | 10  |
| OTU_183   | <i>Deltaproteobacteria</i> , <i>Sva0485</i>          | 4.2       | 4.8              | 0.003            | Proteins  | 10  |
| OTU_184   | <i>Bacteroidetes</i> , <i>Prolixibacter</i>          | 1.4       | 4.5              | 0.083            | Proteins  | 10  |
| OTU_123   | <i>Marinimicrobia</i>                                | 4.3       | 4.5              | 0.007            | Proteins  | 10  |
| OTU_4     | <i>Gammaproteobacteria</i> , <i>Psychromonas</i>     | 936.5     | 4.5              | 0.000            | Proteins  | 5   |
| OTU_80    | <i>Gammaproteobacteria</i> , <i>Vibrionaceae</i>     | 8.7       | 4.3              | 0.015            | Lipids    | 10  |
| OTU_124   | <i>Bacteroidetes</i> , <i>BD2-2</i>                  | 3.6       | 3.7              | 0.055            | Proteins  | 10  |
| OTU_285   | <i>Gammaproteobacteria</i> , <i>JTB255</i>           | 2.7       | 3.6              | 0.083            | Proteins  | 10  |
| OTU_13310 | <i>Deltaproteobacteria</i> , <i>Desulfofrigus</i>    | 5.4       | 3.5              | 0.072            | Lipids    | 10  |
| OTU_4719  | <i>Deltaproteobacteria</i> , <i>NB1-J</i>            | 3.1       | 3.3              | 0.098            | Proteins  | 10  |
| OTU_54    | <i>Gammaproteobacteria</i> , <i>Vibrionaceae</i>     | 9.1       | 3.2              | 0.030            | Proteins  | 5   |
| OTU_128   | <i>Gammaproteobacteria</i> , <i>Sva0071</i>          | 4.1       | 3.1              | 0.045            | Proteins  | 10  |
| OTU_1     | <i>Firmicutes</i> , <i>JTB215</i>                    | 967.1     | 3.0              | 0.018            | Proteins  | 5   |
| OTU_202   | <i>Firmicutes</i> , <i>Clostridiales</i>             | 2.1       | 3.0              | 0.098            | Proteins  | 10  |
| OTU_205   | <i>Gammaproteobacteria</i> , <i>Thiotrichaceae</i>   | 3.2       | 3.0              | 0.083            | Proteins  | 10  |
| OTU_4050  | <i>Firmicutes</i> , <i>Fusibacter</i>                | 25.8      | 3.0              | 0.001            | Proteins  | 10  |
| OTU_4     | <i>Gammaproteobacteria</i> , <i>Psychromonas</i>     | 936.5     | 2.8              | 0.009            | Proteins  | 10  |
| OTU_1     | <i>Firmicutes</i> , <i>JTB215</i>                    | 967.1     | 2.8              | 0.036            | Lipids    | 10  |
| OTU_38    | <i>Firmicutes</i> , <i>Clostridiales</i>             | 11.2      | 2.6              | 0.006            | Proteins  | 5   |
| OTU_19    | <i>Deltaproteobacteria</i> , <i>SEEP-SRB1</i>        | 22.5      | 2.1              | 0.009            | Proteins  | 10  |
| OTU_892   | <i>Deltaproteobacteria</i> , <i>Desulfobulbaceae</i> | 11.0      | 2.1              | 0.098            | Proteins  | 10  |
| OTU_5     | <i>Fusobacteria</i> , <i>Psychrilyobacter</i>        | 297.5     | 2.0              | 0.005            | Proteins  | 5   |
| OTU_36    | <i>Deltaproteobacteria</i> , <i>Desulfobulbaceae</i> | 16.0      | 2.0              | 0.068            | Proteins  | 10  |
| OTU_44    | <i>Deltaproteobacteria</i> , <i>Desulfatiglans</i>   | 16.5      | 1.8              | 0.098            | Proteins  | 10  |
| OTU_67    | <i>Deltaproteobacteria</i> , <i>Desulfoconvexum</i>  | 19.0      | 1.7              | 0.055            | Proteins  | 10  |
| OTU_2     | <i>Deltaproteobacteria</i> , <i>Desulfofrigus</i>    | 699.6     | 1.3              | 0.043            | Proteins  | 10  |
| OTU_5     | <i>Fusobacteria</i> , <i>Psychrilyobacter</i>        | 297.5     | 1.3              | 0.055            | Proteins  | 10  |
