# Supplementary material for: Anaerobic bacterial degradation of protein and lipid macromolecules in subarctic marine sediment
Source: PubMed Central journal article supplement (PMC8027456; doi:10.1038/s41396-020-00817-6), 2020-11-18
Supplement: 41396_2020_817_MOESM12_ESM.pdf [file 41396_2020_817_MOESM12_ESM.pdf]

Supplementary Table S4. Genome statistics of metagenome-assembled genomes.

| MAG                       | Genbank accession no. | Microscope annotation ID | GTDB classification                                                                                               | Closest relative [ANI (% aligned) / AAI (% aligned)]                                          | Completeness (%) | Contamination (%) | Strain heterogeneity | Metagenome bin origin    |
|---------------------------|-----------------------|--------------------------|-------------------------------------------------------------------------------------------------------------------|-----------------------------------------------------------------------------------------------|------------------|-------------------|----------------------|--------------------------|
| <i>Psychromonas</i> GLG-1 | SAMN14421524          | 42481_Bin_4              | d__Bacteria;p__Proteobacteria;c__Gammaproteobacteria;o__Enterobacterales;f__Psychromonadaceae;g__Psychromonas;s__ | <i>Psychromonas aquimarina</i> ATCC BAA-1526<br>GCF_000381745.1 [80.7 (41.8) / 80.73 (66.28)] | 97.39            | 0.81              | 50                   | Lipid microcosm day 5    |
| <i>Clostridia</i> GPF-1   | SAMN14421525          | 42482_Bin_3              | d__Bacteria;p__Firmicutes_A;c__Clostridia;o__Tissierellales;f__;g__;s__                                           | <i>Caloranaerobacter azorensis</i> DSM 13643<br>GCA_900129995.1 [ - / 53.39 (37)]             | 99.07            | 0.7               | 0                    | Protein microcosm day 17 |
| <i>Desulfoluna</i> GLD-1  | SAMN14421526          | 42483_Bin_2              | d__Bacteria;p__Desulfobacterota;c__Desulfobacteria;o__Desulfobacterales;f__Desulfoobacteraceae;g__Desulfoluna;s__ | <i>Desulfoluna spongiiphila</i> GCA_900101345.1<br>[79.42 (39.41) / 76.93 (68.72)]            | 94.95            | 1.36              | 0                    | Lipid microcosm day 17   |
| 42485_Bin_1               | SAMN14421527          | .                        | d__Bacteria;p__Desulfuromonadota;c__Desulfuromonadia;o__Desulfuromonadales;f__Pelobacteraceae_A;g__SFB93;s__      | <i>Pelobacter</i> sp. SFB93 GCF_001887775.1<br>[80.99 (60.65) / 84.98 (67.80)]                | 98.71            | 1.47              | 14.29                | Lipid microcosm day 25   |
| 42482_Bin_1               | SAMN14421528          | .                        | d__Bacteria;p__Desulfobacterota;c__Syntrophobacteria;o__BM002;f__BM002;g__BM002;s__BM002 sp002899795              | <i>Desulfobacteraceae</i> bacterium<br>GCA_002899795.1 [95.31 (73.68) / 95.26 (64.16)]        | 96.61            | 3.39              | 0                    | Protein microcosm day 17 |
| 40935_Bin_6_Spades        | SAMN14421529          | .                        | d__Bacteria;p__Desulfobacterota;c__Desulfobacteria;o__Desulfobacterales;f__BuS5;g__;s__                           | <i>Desulfobacteraceae</i> bacterium<br>GCA_002868985.1 [79.31 (38.02) / 76.48 (45.11)]        | 87.49            | 2.71              | 30                   | Lipid microcosm day 25   |
| 42483_Bin_0_Spades_Anvio  | SAMN14421530          | .                        | d__Bacteria;p__Firmicutes_A;c__Clostridia;o__Peptostreptococcales;f__;g__;s__                                     | <i>Caminicella sporogenes</i> DSM 14501<br>GCF_900142285.1 [ - / 56.06 (42.81)]               | 85.99            | 4.25              | 0                    | Lipid microcosm day 17   |
| 40935_Bin_7_Spades        | SAMN14421531          | .                        | d__Archaea;p__Crenarchaeota;c__Bathyarchaeia;o__TCS64;f__TCS64;g__RBG-16-57-9;s__                                 | Candidatus <i>Bathyarchaeota</i> archaeon<br>GCA_004525915.1 [ 77.69 (15.99) / 71.11 (51.03)] | 83.64            | 3.74              | 0                    | Lipid microcosm day 25   |
| 42485_Bin_1_Spades        | SAMN14421532          | .                        | d__Bacteria;p__Proteobacteria;c__Alphaproteobacteria;o__Micavibrionales;f__;g__;s__                               | <i>Azospirillum</i> sp. K2W22B-5<br>GCF_003590795.1 [ - / 55.67 (43.89)]                      | 80.7             | 0.43              | 0                    | Lipid microcosm day 25   |
