# Supplementary material for: Anaerobic bacterial degradation of protein and lipid macromolecules in subarctic marine sediment
Source: PubMed Central journal article supplement (PMC8027456; doi:10.1038/s41396-020-00817-6), 2020-11-18
Supplement: 41396_2020_817_MOESM13_ESM.pdf [file 41396_2020_817_MOESM13_ESM.pdf]

|                                                                                       |                                        |                                             |                                                  |                                        |
|---------------------------------------------------------------------------------------|----------------------------------------|---------------------------------------------|--------------------------------------------------|----------------------------------------|
| <b>Histidine degradation to glutamate</b>                                             |                                        |                                             |                                                  |                                        |
| histidin ammonia lyase (EC 4.3.1.3)                                                   | K337_v1_20957                          | PSYM_v1_80008                               | FUSI_v1_460027                                   | -                                      |
| urocanate hydratase (EC 4.2.1.49)                                                     | K337_v1_20351                          | -                                           | FUSI_v1_640043                                   | -                                      |
| imidazolonepropionase (EC 3.5.2.7)                                                    | K337_v1_20956                          | -                                           | 040; FUSI_v1_680002; FUSI_v1_680003              | DESP_v1_850010                         |
| formimidoylglutamase (EC 3.5.3.8)                                                     | K337_v1_20958                          | -                                           | -                                                | -                                      |
| <b>Glutamate degradation via methylaspartate pathway to pyruvate</b>                  |                                        |                                             |                                                  |                                        |
| methylaspartate mutase, mutE (EC 5.4.99.1)                                            | K337_v1_11676; K337_v1_11678           | -                                           | il_v1_940031; FUSI_v1_940032                     | -                                      |
| methylaspartate ammonia-lyase (EC 4.3.1.2)                                            | K337_v1_11673                          | -                                           | -                                                | -                                      |
| 2-methylmalate dehydratase (EC 4.2.1.34)                                              | -                                      | -                                           | -                                                | -                                      |
| citramalate lyase (EC 4.1.3.22)                                                       | -                                      | -                                           | -                                                | -                                      |
| <b>Glutamate degradation via hydroxyglutarate pathway to butyrate</b>                 |                                        |                                             |                                                  |                                        |
| glutamate / leucine dehydrogenase (EC 1.4.1.2; EC 1.4.1.3; EC 1.4.1.4)                | K337_v1_11103; K337_v1_11104           | M_v1_60003; PSYM_v1_2910                    | FUSI_v1_10079                                    | 2_v1_1130001; DESP_v1_180001           |
| 2-hydroxyglutarate dehydrogenase (EC 1.1.99.2)                                        | K337_v1_11115                          | -                                           | FUSI_v1_10080                                    | -                                      |
| glutaconate CoA-transferase (EC 2.8.3.12)                                             | -                                      | -                                           | -                                                | -                                      |
| 2-hydroxyglutaryl CoA dehydratase (EC 4.2.1.-)                                        | r1_21025; K337_v1_11508; K337_v1_11509 | -                                           | -                                                | -                                      |
| glutaconyl-CoA decarboxylase subunit delta (EC 4.1.1.70)                              | K337_v1_20059                          | -                                           | -                                                | -                                      |
| glutaconyl-CoA decarboxylase subunit gamma (EC 4.1.1.70)                              | K337_v1_20060                          | -                                           | FUSI_v1_940037                                   | -                                      |
| glutaconyl-CoA decarboxylase subunit beta (EC 4.1.1.70)                               | K337_v1_20061                          | -                                           | FUSI_v1_940038                                   | -                                      |
| butyryl-CoA dehydrogenase (EC 1.3.8.1)                                                | K337_v1_30044                          | -                                           | FUSI_v1_410001                                   | -                                      |
| butyryl coenzyme A transferase, alpha subunit (EC 2.8.3.8)                            | K337_v1_10805                          | -                                           | -                                                | -                                      |
| butyryl coenzyme A transferase, beta subunit (EC 2.8.3.8)                             | K337_v1_10806                          | -                                           | -                                                | -                                      |
| <b>Asparagin degradation to aspartate</b>                                             |                                        |                                             |                                                  |                                        |
| asparaginase (EC 3.5.1.1)                                                             | K337_v1_20898                          | M_v1_100035; PSYM_v1_100                    | FUSI_v1_280010                                   | DESP_v1_1280014                        |
| <b>L-Homocysteine degradation to cysteine and L-cysteine degradation to pyruvate</b>  |                                        |                                             |                                                  |                                        |
| cystathionine β-synthase (EC 4.2.1.22)                                                | -                                      | PSYM_v1_2510003                             | il_v1_150018; FUSI_v1_111                        | -                                      |
| cystathionine gamma-lyase (EC 4.4.1.1) / cysteine synthase (EC 2.5.1.47)              | K337_v1_11683; K337_v1_20987           | M_v1_660011; PSYM_v1_410                    | FUSI_v1_460004                                   | DESP_v1_220021                         |
| <b>Tryptophane degradation to pyruvate</b>                                            |                                        |                                             |                                                  |                                        |
| tryptophanase / L-cysteine desulfhydrase, PLP-dependent (EC 4.1.99.1)                 | K337_v1_20947                          | -                                           | -                                                | -                                      |
| <b>L-Serine degradation to pyruvate / Threonine degradation (I) to 2-oxobutanoate</b> |                                        |                                             |                                                  |                                        |
| L-serine ammonia-lyase (EC 4.3.1.17) / threonine ammonia-lyase (EC 4.3.1.19)          | K337_v1_10253; K337_v1_11287           | M_v1_590011; PSYM_v1_120011; PSYM_v1_120012 | FUSI_v1_630018; FUSP_v1_1300002; FUSP_v1_1300003 | DESP_v1_510001                         |
| <b>Alanine degradation to pyruvate</b>                                                |                                        |                                             |                                                  |                                        |
| alanine dehydrogenase (EC 1.4.1.1)                                                    | K337_v1_11051; K337_v1_11052           | PSYM_v1_480006                              | -                                                | DESP_v1_20046                          |
| <b>Methionine degradation to 2-oxobutanoate and methanethiol</b>                      |                                        |                                             |                                                  |                                        |
| methionine gamma-lyase (EC 4.4.1.11)                                                  | r1_10331; K337_v1_11588; K337_v1_11589 | PSYM_v1_20036                               | 005; FUSI_v1_560010; FUSI_v1_560011              | -                                      |
| <b>Threonine degradation (II) to glycine and acetyl-CoA</b>                           |                                        |                                             |                                                  |                                        |
| L-threonine 3-dehydrogenase (EC 1.1.1.103)                                            | -                                      | PSYM_v1_2590001                             | FUSI_v1_560008                                   | DESP_v1_180022                         |
| glycine C-acetyltransferase (EC 2.3.1.29)                                             | -                                      | PSYM_v1_2590002                             | FUSI_v1_520059                                   | xDESP_v1_180021                        |
| <b>Threonine degradation (IV) to glycine and acetyl-CoA</b>                           |                                        |                                             |                                                  |                                        |
| low specificity L-threonine aldolase (EC 4.1.2.5)                                     | K337_v1_11380                          | -                                           | 001; FUSI_v1_800055; FUSI_v1_800056              | DESP_v1_280002                         |
| iron-type aldehyde-alcohol dehydrogenase (NAD <sup>+</sup> ) (EC 1.2.1.10/EC 1.1.1.1) | K337_v1_20115                          | -                                           | il_v1_540069; FUSI_v1_670010; FUSI_v1_670011     | DESP_v1_910009; DESP_v1_910010         |
| <b>Arginine degradation (III) to putrescine</b>                                       |                                        |                                             |                                                  |                                        |
| arginine decarboxylase (EC 4.1.1.19)                                                  | K337_v1_12041                          | -                                           | FUSI_v1_1250057                                  | -                                      |
| agmatinase (EC 3.5.3.11)                                                              | K337_v1_12038                          | -                                           | -                                                | -                                      |
| <b>Arginine degradation (V) to L-ornithine and CO<sub>2</sub> (deiminase pw)</b>      |                                        |                                             |                                                  |                                        |
| arginine deaminase (EC 2.5.3.6)                                                       | -                                      | -                                           | FUSI_v1_270051                                   | -                                      |
| ornithine carbonyltransferase (EC 2.1.3.3)                                            | K337_v1_11897                          | PSYM_v1_210021                              | il_v1_270052; FUSI_v1_111                        | DESP_v1_880023                         |
| carbamate kinase (EC 2.7.2.2)                                                         | -                                      | PSYM_v1_500009                              | il_v1_420066; FUSI_v1_840                        | -                                      |
| <b>Lysine degradation to butyrate and acetate</b>                                     |                                        |                                             |                                                  |                                        |
| lysine 2,3-aminomutase (EC 5.4.3.2)                                                   | K337_v1_10812                          | PSYM_v1_780016                              | -                                                | 20011; DESP_v1_10005; DESP_v1_10006    |
| lysine 5,6-aminomutase (EC 5.4.3.3)                                                   | K337_v1_10808; K337_v1_10809           | -                                           | -                                                | -                                      |
| L-erythro-3,5-diaminohexanoate dehydrogenase (EC 1.4.1.11)                            | K337_v1_10813                          | -                                           | -                                                | -                                      |
| 3-keto-5-aminohexanoate cleavage enzyme                                               | K337_v1_10814                          | -                                           | -                                                | -                                      |
| 3-aminobutyryl-CoA ammonia-lyase (EC 4.3.1.14)                                        | K337_v1_10815                          | -                                           | -                                                | -                                      |
| acyl-CoA dehydrogenase (EC 1.3.8.1)                                                   | K337_v1_30044                          | -                                           | -                                                | 0011; DESP_v1_1600001; DESP_v1_1600002 |
| butyrate—acetoacetate CoA-transferase (EC 2.8.3.9)                                    | -                                      | -                                           | -                                                | -                                      |
| acetyl-CoA acetyltransferase (EC 2.3.1.9)                                             | K337_v1_30048                          | -                                           | -                                                | 008; DESP_v1_1000008; DESP_v1_1000009  |
| <b>Glycine cleavage complex</b>                                                       |                                        |                                             |                                                  |                                        |
| glycine dehydrogenase (decarboxylating) (EC 1.4.4.2)                                  | r1_20307; K337_v1_20308; K337_v1_20309 | PSYM_v1_420003                              | il_v1_650008; FUSI_v1_650009                     | DESP_v1_20041; DESP_v1_20042           |
| aminomethyltransferase (EC 2.1.2.10)                                                  | K337_v1_20310                          | PSYM_v1_420003                              | il_v1_650008; FUSI_v1_650009                     | DESP_v1_20041; DESP_v1_20042           |

|                                                                                                                          |                              |                           |                                                              |                                                                   |
|--------------------------------------------------------------------------------------------------------------------------|------------------------------|---------------------------|--------------------------------------------------------------|-------------------------------------------------------------------|
| dihydrolipoyl dehydrogenase (EC 1.8.1.4)                                                                                 | K337_v1_11268; K337_v1_20310 | PSYM_v1_420003            | 006; FUSI_v1_650007; FUSI_042; DESP_v1_20045; DESP_v1_120019 | -                                                                 |
| <b>branched-chain <math>\alpha</math>-keto acid dehydrogenase complex</b>                                                |                              |                           |                                                              |                                                                   |
| 2-keto-isovalerate dehydrogenase (EC 1.2.4.4)                                                                            | -                            | -                         | FUSI_v1_810055                                               | -                                                                 |
| dihydrolipoyllysine-residue (EC 2.3.1.168)                                                                               | -                            | -                         | FUSI_v1_810055                                               | -                                                                 |
| dihydrolipoyl dehydrogenase (EC 1.8.1.4)                                                                                 | -                            | -                         | _v1_1010005; FUSI_v1_111                                     | -                                                                 |
| <b>Aminotransferases</b>                                                                                                 |                              |                           |                                                              |                                                                   |
| aminotransferase class I and II                                                                                          | K337_v1_10796                | -                         | il_v1_410019; FUSI_v1_890                                    | -                                                                 |
| aminotransferase class III                                                                                               | -                            | -                         | FUSI_v1_640091                                               | -                                                                 |
| aromatic acid aminotransferase (EC 2.6.1.57)                                                                             | -                            | -                         | SI_v1_860012; FUSI_v1_10                                     | -                                                                 |
| aspartate aminotransferase (EC 2.6.1.1)                                                                                  | K337_v1_12185                | M_v1_1700002; PSYM_v1_106 | SI_v1_220004; FUSI_v1_20                                     | DESP_v1_120019                                                    |
| branched-chain amino transferase (EC:2.6.1.42)                                                                           | K337_v1_11732; K337_v1_20081 | -                         | il_v1_840093; FUSI_v1_620                                    | DESP_v1_1080001                                                   |
| histidinol-phosphate aminotransferase (EC 2.6.1.9)                                                                       | -                            | v1_3080002; PSYM_v1_11600 | FUSI_v1_360042                                               | DESP_v1_1210008                                                   |
| alanine transaminase (EC 2.6.1.2)                                                                                        | -                            | PSYM_v1_760004            | -                                                            | -                                                                 |
| alanine--glyoxylate transaminase (EC 2.6.1.44)                                                                           | K337_v1_20164                | -                         | -                                                            | -                                                                 |
| acetylornithine aminotransferase (EC 2.6.1.11)                                                                           | -                            | PSYM_v1_80040             | SI_v1_10046; FUSI_v1_300                                     | DESP_v1_880024                                                    |
| <b>Beta-oxidation of long-chain fatty acids</b>                                                                          |                              |                           |                                                              |                                                                   |
| Long-chain acyl-CoA synthetase (EC 6.2.1.3 / EC 6.2.1.-) (CoA-ligase)                                                    | K337_v1_10867                | M_v1_2450001; PSYM_v1_41  | -                                                            | 014; DESP_v1_450036; DESP_v1_13; DESP_v1_1600001; DESP_v1_1240008 |
| acyl-CoA dehydrogenase (EC 1.3.8.-)                                                                                      | -                            | PSYM_v1_1300009           | FUSI_v1_410001                                               | -                                                                 |
| fused enoyl-CoA hydratase/isomerase ; 3-hydroxyacyl-CoA dehydrogenase (EC 4.2.1.17, EC 5.3.3.8, EC 5.1.2.3, EC 1.1.1.35) | -                            | PSYM_v1_3780002           | -                                                            | -                                                                 |
| enoyl-CoA hydratase/isomerase (EC 4.2.1.17)                                                                              | -                            | PSYM_v1_2230002           | -                                                            | 0008; DESP_v1_290019; DESP_v1_1240008                             |
| 3-hydroxyacyl-CoA dehydrogenase (EC 1.1.1.35)                                                                            | -                            | -                         | -                                                            | P_v1_2710002; DESP_v1_500016                                      |
| acyl-CoA thiolase (acetyl-CoA transferase) (EC 2.3.1.16)                                                                 | -                            | M_v1_3630003; PSYM_v1_378 | -                                                            | -                                                                 |
| <b>Glycerol degradation</b>                                                                                              |                              |                           |                                                              |                                                                   |
| glycerol-3-phosphate transporter                                                                                         | K337_v1_10282                | -                         | FUSI_v1_10096                                                | -                                                                 |
| glycerol facilitator                                                                                                     | K337_v1_10202                | -                         | FUSI_v1_810044                                               | -                                                                 |
| glycerol kinase (sn-glycerol-3-phosphate generating) (EC 2.7.1.30)                                                       | K337_v1_10203                | -                         | FUSI_v1_810043                                               | DESP_v1_1420006                                                   |
| glycerol-3-phosphate dehydrogenase (EC 1.1.5.3)                                                                          | K337_v1_11183; K337_v1_12015 | -                         | r1_520017; FUSI_v1_96000                                     | DESP_v1_1240008                                                   |
| <b>Glycolysis</b>                                                                                                        | present                      | present                   | present                                                      | present                                                           |
| <b>Lactate degradation to pyruvate (reversible except for LUD-type L-lactate dehydrogenase)</b>                          |                              |                           |                                                              |                                                                   |
| L-lactate permease, LutP and LctP                                                                                        | K337_v1_21046                | -                         | FUSI_v1_1110024                                              | P_v1_620009; DESP_v1_249                                          |
| L-lactate, D-lactate, and/or glycolate dehydrogenase, GlcD                                                               | K337_v1_21047                | -                         | l_v1_430010; FUSI_v1_111                                     | 0008; DESP_v1_70033; DESP_v1_1240008                              |
| L-lactate, D-lactate, and/or glycolate dehydrogenase, GlcF                                                               | -                            | -                         | -                                                            | SP_v1_620007; DESP_v1_70                                          |
| D-lactate dehydrogenase (cytochrome) (EC 1.1.2.4)                                                                        | -                            | -                         | FUSI_v1_1210024;                                             | -                                                                 |
| L-lactate dehydrogenase (EC 1.1.1.27)                                                                                    | -                            | -                         | FUSI_v1_460018                                               | -                                                                 |
| D-lactate dehydrogenase (EC 1.1.1.28)                                                                                    | K337_v1_11115                | PSYM_v1_50008             | FUSI_v1_10080                                                | -                                                                 |
| L-lactate dehydrogenase (EC 1.1.2.3)                                                                                     | -                            | -                         | -                                                            | -                                                                 |
| LUD-type L-lactate dehydrogenase, LutABC (EC 1.1.-.-)                                                                    | -                            | -                         | -                                                            | 0001, DESP_v1_450002, DESP_v1_1240008                             |
| <b>Butyrate degradation to butyryl-CoA (reversible)</b>                                                                  |                              |                           |                                                              |                                                                   |
| butyrate kinase (EC 2.7.2.7)                                                                                             | K337_v1_11804                | -                         | 0033; FUSI_v1_520026; FU                                     | DESP_v1_480015                                                    |
| phosphate butyryltransferase (EC 2.3.1.19)                                                                               | K337_v1_11805                | -                         | 0032; FUSI_v1_520025; FU                                     | DESP_v1_480016                                                    |
| <b>Butyrate degradation to butyryl-CoA like in Schmidt et al., 2013 (continues with classic beta-oxidation)</b>          |                              |                           |                                                              |                                                                   |
| butanoate CoA-transferase (EC 2.8.3.-)                                                                                   | -                            | -                         | -                                                            | DESP_v1_1500004                                                   |
| <b>Formate degradation to CO2 and H+</b>                                                                                 |                              |                           |                                                              |                                                                   |
| formate dehydrogenase accessory protein, FdhE                                                                            | -                            | -                         | -                                                            | DESP_v1_2210006                                                   |
| formate dehydrogenase alpha subunit, FdhA                                                                                | -                            | -                         | -                                                            | DESP_v1_2210007/8                                                 |
| formate dehydrogenase beta subunit, FdhB                                                                                 | -                            | -                         | -                                                            | DESP_v1_2210009                                                   |
| <b>iso-butyrate isomerization to butryl-CoA</b>                                                                          |                              |                           |                                                              |                                                                   |
| cob(I)alamin adenosyltransferase                                                                                         | K337_v1_20070                | PSYM_v1_200016            | FUSI_v1_1080006                                              | P_v1_1080011; DESP_v1_30                                          |
| isobutyryl-CoA mutase, N-terminal domain subunit                                                                         | -                            | -                         | FUSI_v1_940031                                               | -                                                                 |
| isobutyryl-CoA mutase, C-terminal domain subunit (cobalamin B12-binding domain protein)                                  | -                            | -                         | FUSI_v1_940032                                               | -                                                                 |
| LAO/AO transport system ATPase, MeaB-like protein                                                                        | -                            | -                         | FUSI_v1_940033                                               | -                                                                 |
| <b>Propionate degradation to succinyl-CoA (reversible)</b>                                                               |                              |                           |                                                              |                                                                   |
| propionyl-CoA carboxylase, gamma subunit (EC 6.4.1.3)                                                                    | -                            | -                         | FUSI_v1_940035                                               | DESP_v1_1040006                                                   |
| propionyl-CoA carboxylase, beta subunit (EC 6.4.1.3)                                                                     | -                            | -                         | FUSI_v1_940037                                               | DESP_v1_1040008                                                   |
| acetyl-CoA carboxylase, gamma subunit (EC 6.4.1.2) / propionyl-CoA carboxylase, alpha subunit (EC 6.4.1.3)               | K337_v1_10646                | -                         | FUSI_v1_520003/4                                             | -                                                                 |
| acetyl-CoA carboxylase, beta subunit (EC 6.4.1.2) / propionyl-CoA carboxylase, gamma subunit (EC 6.4.1.3)                | K337_v1_10913                | -                         | FUSI_v1_520002                                               | -                                                                 |
| methylmalonyl-CoA epimerase (EC 5.1.99.1)                                                                                | -                            | -                         | FUSI_v1_940034                                               | -                                                                 |
| methylmalonyl-CoA mutase accessory protein                                                                               | -                            | -                         | FUSI_v1_940033                                               | -                                                                 |
| methylmalonyl-CoA mutase (EC 5.4.99.2)                                                                                   | -                            | -                         | FUSI_v1_940031/2                                             | -                                                                 |

**TCA cycle**

|                                                                                                                  |                                  |                            |                                                  |                           |
|------------------------------------------------------------------------------------------------------------------|----------------------------------|----------------------------|--------------------------------------------------|---------------------------|
| citrate synthase (EC 2.3.3.1)                                                                                    | -                                | PSYM_v1_30012              | FUSI_v1_800040                                   | SP_v1_90043; DESP_v1_160  |
| aconitate hydratase (EC 4.2.1.3)                                                                                 | -                                | M_v1_2890003; PSYM_v1_128  | FUSI_v1_800038                                   | 42; DESP_v1_1190001; DESI |
| isocitrate dehydrogenase (NAD+) (EC 1.1.1.41) / isocitrate dehydrogenase (NADP+) (EC 1.1.1.42)                   | -                                | PSYM_v1_2270005            | FUSI_v1_800039                                   | DESP_v1_2350002           |
| 2-oxoglutarate decarboxylase, thiamin-requiring (EC 1.2.4.2) [2-oxoglutarate dehydrogenase complex]              | -                                | PSYM_v1_30006              | -                                                | -                         |
| dihydrolipoamide succinyltransferase (EC 2.3.1.61) [2-oxoglutarate dehydrogenase complex]                        | -                                | PSYM_v1_30005              | FUSI_v1_1170017                                  | -                         |
| lipoamide dehydrogenase (EC 1.8.1.4) [2-oxoglutarate dehydrogenase complex]                                      | K337_v1_11268                    | PSYM_v1_420003             | 018; FUSI_v1_1010005; FU_v1_20045; DESP_v1_86001 | -                         |
| succinyl-CoA synthetase, alpha chain (EC 6.2.1.5)                                                                | -                                | YM_v1_30002; PSYM_v1_30003 | -                                                | DESP_v1_2040003           |
| succinyl-CoA synthetase, beta chain (EC 6.2.1.5)                                                                 | -                                | PSYM_v1_30004              | -                                                | DESP_v1_2040005           |
| succinate dehydrogenase (EC 1.3.5.1)                                                                             | -                                | YM_v1_30008; PSYM_v1_300   | FUSI_v1_1290010                                  | P_v1_2040002; DESP_v1_165 |
| fumarate hydratase class I (EC 4.2.1.2)                                                                          | K337_v1_11158/9; K337_v1_20911/2 | PSYM_v1_1700003            | _v1_1250059; FUSI_v1_12                          | P_v1_1020008; DESP_v1_226 |
| malate dehydrogenase (EC 1.1.1.37) / Malate dehydrogenase (oxaloacetate-decarboxylating) (NADP(+)) (EC 1.1.1.40) | -                                | M_v1_570011; PSYM_v1_381   | -                                                | DESP_v1_230006            |

**ferredoxin oxidoreductases**

|                                                                                                     |               |                           |                                                    |
|-----------------------------------------------------------------------------------------------------|---------------|---------------------------|----------------------------------------------------|
| 2-oxoglutarate ferredoxin oxidoreductase subunit alpha (EC 1.2.7.3) (KOR)                           | -             | PSYM_v1_510008            | 029; FUSI_v1_1210029; FU:PS_v1_690022; DESP_v1_96  |
| 2-oxoglutarate ferredoxin oxidoreductase subunit beta (EC 1.2.7.3) (KOR)                            | -             | PSYM_v1_510009            | 030; FUSI_v1_1210028; FU:0004; DESP_v1_690021; DES |
| 2-oxoglutarate ferredoxin oxidoreductase subunit gamma (EC 1.2.7.3) (KOR)                           | -             | -                         | 031; FUSI_v1_1210027; FU: DESP_v1_2130005          |
| 2-oxoglutarate ferredoxin oxidoreductase subunit delta (EC 1.2.7.3) (KOR)                           | -             | -                         | L_v1_520028; FUSI_v1_121 DESP_v1_2130002           |
| pyruvate/ketoisovalerate oxidoreductase, delta subunit, putative (EC 1.2.7.1/ EC 1.2.7.7) (POR/VOR) | K337_v1_10071 | -                         | SI_v1_10160; FUSI_v1_101 DESP_v1_1080004           |
| pyruvate/ketoisovalerate oxidoreductase, alpha subunit (EC 1.2.7.1/ EC 1.2.7.7) (POR/VOR)           | K337_v1_10072 | PSYM_v1_2910001           | SI_v1_10161; FUSI_v1_101 DESP_v1_1080005           |
| pyruvate/ketoisovalerate oxidoreductase, beta subunit (EC 1.2.7.1/ EC 1.2.7.7) (POR/VOR)            | K337_v1_10073 | -                         | SI_v1_10162; FUSI_v1_101 DESP_v1_1080006           |
| pyruvate/ketoisovalerate oxidoreductase, gamma subunit (EC 1.2.7.1/ EC 1.2.7.7) (POR/VOR)           | K337_v1_10074 | PSYM_v1_2910002           | SI_v1_10159; FUSI_v1_101 DESP_v1_1080003           |
| tungsten-containing aldehyde:ferredoxin oxidoreductase (EC 1.2.7.5) (AOR)                           | K337_v1_10511 | -                         | FUSI_v1_1110012                                    |
| pyruvate-flavodoxin oxidoreductase (EC 1.2.7.-) (PFOR)                                              | K337_v1_11862 | M_v1_2050003; PSYM_v1_253 | FUSI_v1_120078                                     |
| indolepyruvate:ferredoxin oxidoreductase (IOR) subunit $\alpha$ (EC 1.2.7.8)                        | -             | -                         | FUSI_v1_800015                                     |
| indolepyruvate:ferredoxin oxidoreductase (IOR) subunit $\beta$ (EC 1.2.7.8)                         | -             | -                         | FUSI_v1_800014                                     |

**Oxobutanoate/pyruvate degradation to propionate/acetate (via propionyl/acetyl-P intermediate)**

|                                                       |               |                 |                |                          |
|-------------------------------------------------------|---------------|-----------------|----------------|--------------------------|
| 2-ketobutyrate/pyruvate-formate lyase I (EC 2.3.1.54) | K337_v1_11221 | PSYM_v1_2190001 | FUSI_v1_480003 | DESP_v1_550004           |
| phosphate acetyltransferase (EC 2.3.1.8)              | K337_v1_11864 | PSYM_v1_120027  | FUSI_v1_640081 | P_v1_960006; DESP_v1_128 |
| acetate kinase A and propionate kinase 2 (EC 2.7.2.1) | K337_v1_11863 | PSYM_v1_120028  | FUSI_v1_320010 | DESP_v1_1280030          |

**Pyruvate dehydrogenase complex, conversion of pyruvate to acetyl-CoA**

|                                                                |               |                           |                                                  |   |
|----------------------------------------------------------------|---------------|---------------------------|--------------------------------------------------|---|
| pyruvate dehydrogenase E1 component alpha subunit (EC 1.2.4.1) | K337_v1_11265 | M_v1_420001; PSYM_v1_140  | FUSI_v1_810058                                   | - |
| pyruvate dehydrogenase E1 component beta subunit (EC 1.2.4.1)  | K337_v1_11266 | PSYM_v1_2320002           | FUSI_v1_810057                                   | - |
| dihydrolipoyllysine-residue acetyltransferase (EC 2.3.1.12)    | K337_v1_11267 | M_v1_2320003; PSYM_v1_421 | v1_810056; FUSI_v1_117                           | - |
| dihydrolipoyl dehydrogenase (EC 1.8.1.4)                       | K337_v1_11268 | PSYM_v1_420003            | 018; FUSI_v1_1010005; FU_v1_20045; DESP_v1_86001 | - |

**Acetate production from acetyl-CoA or reverse**

|                                                                                                      |   |                          |   |   |
|------------------------------------------------------------------------------------------------------|---|--------------------------|---|---|
| acetyl-CoA synthetase bifunctional acetate—CoA / propionate—CoA ligase (AMP-forming) (EC 6.2.1.1/17) | - | M_v1_1400002; PSYM_v1_45 | - | - |
| acetate—CoA ligase (ADP-forming) (EC 6.2.1.13)                                                       | - | -                        | - | - |

**pyruvate to oxalacetate**

|                                   |               |   |                 |   |
|-----------------------------------|---------------|---|-----------------|---|
| pyruvate carboxylase (EC 6.4.1.1) | K337_v1_20163 | - | FUSI_v1_1200032 | - |
|-----------------------------------|---------------|---|-----------------|---|

**Sulfur cycling genes**

|                                                                                              |               |                |                |                 |
|----------------------------------------------------------------------------------------------|---------------|----------------|----------------|-----------------|
| adenylyl-sulfate reductase, AprB (EC 1.8.99.2)                                               | -             | -              | -              | DESP_v1_120032  |
| adenylyl-sulfate reductase, AprA (EC 1.8.99.2)                                               | -             | -              | -              | DESP_v1_120031  |
| quinone-interacting membrane-bound oxidoreductase complex, QmoA                              | -             | -              | -              | DESP_v1_120030  |
| quinone-interacting membrane-bound oxidoreductase complex, QmoB                              | -             | -              | -              | DESP_v1_120029  |
| quinone-interacting membrane-bound oxidoreductase complex, QmoC                              | -             | -              | -              | DESP_v1_120028  |
| sulfate adenylyltransferase, Sat (EC 2.7.7.4)                                                | -             | -              | -              | DESP_v1_120027  |
| dissimilatory sulfite reductase, DsrA (EC 1.8.99.5)                                          | -             | -              | -              | DESP_v1_100003  |
| dissimilatory sulfite reductase, DsrB (EC 1.8.99.5)                                          | -             | -              | -              | DESP_v1_100002  |
| probable regulatory protein, DsrD                                                            | -             | -              | -              | DESP_v1_100001  |
| dissimilatory sulfite reductase, DsrC (EC 1.8.99.5)                                          | -             | -              | -              | DESP_v1_160016  |
| putative component of dissimilatory sulfate reduction system, DsrT                           | -             | -              | -              | DESP_v1_50034   |
| sulfite reduction-associated membrane complex ([DsrC]-trisulfide reductase), DsrM (1.8.5.M1) | -             | -              | -              | DESP_v1_50033   |
| sulfite reduction-associated membrane complex ([DsrC]-trisulfide reductase), DsrK (1.8.5.M1) | -             | -              | -              | DESP_v1_50032   |
| sulfite reduction-associated membrane complex ([DsrC]-trisulfide reductase), DsrJ (1.8.5.M1) | -             | -              | -              | DESP_v1_50031   |
| sulfite reduction-associated membrane complex ([DsrC]-trisulfide reductase), DsrO (1.8.5.M1) | -             | -              | -              | DESP_v1_50030   |
| sulfite reduction-associated membrane complex ([DsrC]-trisulfide reductase), DsrP (1.8.5.M1) | -             | -              | -              | DESP_v1_50029   |
| probable siroheme amidase, DsrN (EC 6.3.5.M1)                                                | -             | -              | -              | DESP_v1_1190011 |
| soluble inorganic pyrophosphatase (sPPase) (EC 3.6.1.1)                                      | K337_v1_11979 | PSYM_v1_310018 | -              | DESP_v1_30033   |
| adenylate kinase (EC 2.7.4.3)                                                                | K337_v1_30030 | PSYM_v1_440003 | FUSI_v1_940095 | DESP_v1_1090008 |

|                                                                      |                              |                              |                |                             |
|----------------------------------------------------------------------|------------------------------|------------------------------|----------------|-----------------------------|
| Anaerobic sulfite reductase, subunit A (EC 1.8.1.-)                  | K337_v1_20489; K337_v1_20742 | -                            | -              | -                           |
| Anaerobic sulfite reductase, subunit B (EC 1.8.1.-)                  | K337_v1_20488; K337_v1_20741 | -                            | -              | -                           |
| Anaerobic sulfite reductase, subunit C (EC 1.8.1.-)                  | K337_v1_20487; K337_v1_20740 | -                            | -              | -                           |
| <b>Nitrate reduction to ammonium (DNRA)</b>                          |                              |                              |                |                             |
| periplasmic nitrate reductase, large subunit, NapA                   | -                            | M_v1_295000; PSYM_v1_274     | -              | -                           |
| periplasmic nitrate reductase, electron transfer subunit, NapB       | -                            | PSYM_v1_2740004              | -              | -                           |
| periplasmic nitrate reductase, cytochrome c-type, NapC               | -                            | PSYM_v1_2740003              | -              | -                           |
| periplasmic nitrate reductase, chaperone, NapD                       | -                            | PSYM_v1_2950002              | -              | -                           |
| periplasmic nitrate reductase, ferredoxin-type protein, NapF         | -                            | PSYM_v1_2950003              | -              | -                           |
| periplasmic nitrate reductase, ferredoxin-type protein, NapG         | -                            | PSYM_v1_2740006              | -              | -                           |
| periplasmic nitrate reductase, ferredoxin-type protein, NapH         | -                            | PSYM_v1_2740005              | -              | -                           |
| formate-dependent nitrite reductase, cytochrome c552, NrfA           | -                            | -                            | -              | -                           |
| formate-dependent nitrite reductase, cytochrome c-type protein, NrfB | -                            | -                            | -              | -                           |
| formate-dependent nitrite reductase, 4Fe4S subunit, NrfC             | -                            | PSYM_v1_150004               | -              | -                           |
| formate-dependent nitrite reductase, membrane subunit, NrfD          | -                            | PSYM_v1_150005               | -              | -                           |
| <b>Fumarate reduction</b>                                            |                              |                              |                |                             |
| fumarate reductase, flavoprotein subunit                             | -                            | PSYM_v1_1240008              | -              | -                           |
| fumarate reductase iron-sulfur subunit                               | -                            | PSYM_v1_1240007              | -              | -                           |
| fumarate reductase, subunit C                                        | -                            | PSYM_v1_1240006              | -              | -                           |
| fumarate reductase, D subunit                                        | -                            | PSYM_v1_1240005              | -              | -                           |
| <b>Oxygen respiration</b>                                            |                              |                              |                |                             |
| cbb3-type cytochrome c oxidase (EC 1.9.3.1)                          | -                            | PSYM_v1_70014; PSYM_v1_700   | -              | -                           |
| cytochrome bd-type oxidase                                           | -                            | PSYM_v1_180033; PSYM_v1_180  | -              | P_v1_4300221; DESP_v1_430   |
| cytochrome-c oxidase                                                 | -                            | -                            | -              | PSYM_v1_460010; DESP_v1_460 |
| <b>Type I SS</b>                                                     |                              |                              |                |                             |
| TolC                                                                 | -                            | PSYM_v1_3060001              | -              | DESP_v1_360002              |
| HlyD                                                                 | -                            | PSYM_v1_3060002              | -              | -                           |
| HlyB                                                                 | -                            | PSYM_v1_3060003              | -              | -                           |
| <b>Type II SS (general secretion pathway protein, gspD-N)</b>        |                              |                              |                |                             |
| GspC                                                                 | -                            | PSYM_v1_50014                | -              | DESP_v1_640009              |
| GspD                                                                 | K337_v1_10274                | PSYM_v1_50015                | -              | DESP_v1_640008              |
| GspE                                                                 | -                            | PSYM_v1_50016                | -              | DESP_v1_640007              |
| GspF                                                                 | -                            | PSYM_v1_50017                | -              | DESP_v1_2030004             |
| GspG                                                                 | -                            | PSYM_v1_50018                | -              | DESP_v1_640017              |
| GspH                                                                 | -                            | PSYM_v1_50019                | -              | -                           |
| GspI                                                                 | -                            | PSYM_v1_50020                | -              | DESP_v1_640015              |
| GspJ                                                                 | -                            | PSYM_v1_50022                | -              | DESP_v1_640014              |
| GspK                                                                 | -                            | PSYM_v1_50023                | -              | DESP_v1_640013              |
| GspL                                                                 | -                            | PSYM_v1_50024                | -              | DESP_v1_640012              |
| GspM                                                                 | -                            | PSYM_v1_50025                | -              | DESP_v1_640011              |
| GspN                                                                 | -                            | PSYM_v1_50026                | -              | DESP_v1_640010              |
| <b>Twin arginine translocation</b>                                   |                              |                              |                |                             |
| TatA                                                                 | -                            | PSYM_v1_2920002              | -              | DESP_v1_130035              |
| TatB                                                                 | -                            | PSYM_v1_2920003              | -              | DESP_v1_400009              |
| TatC                                                                 | -                            | PSYM_v1_2920004              | -              | DESP_v1_400010              |
| TatD (not needed, e.g. . Goosens et al. 2014: TAT system)            | -                            | PSYM_v1_2920005              | -              | -                           |
| <b>Sec pathway</b>                                                   |                              |                              |                |                             |
| SecA                                                                 | K337_v1_11974                | PSYM_v1_530006               | FUSI_v1_940046 | DESP_v1_610007              |
| SecB                                                                 | -                            | PSYM_v1_30031                | -              | -                           |
| SecF                                                                 | K337_v1_10344                | PSYM_v1_1420009; PSYM_v1_242 | FUSI_v1_180008 | DESP_v1_340009              |
| SecD                                                                 | K337_v1_10343                | PSYM_v1_1420010; PSYM_v1_242 | FUSI_v1_180009 | DESP_v1_340010              |
| YajC                                                                 | K337_v1_12023                | PSYM_v1_2420003              | FUSI_v1_180012 | DESP_v1_340011              |
| SecE                                                                 | K337_v1_10236                | PSYM_v1_230024               | FUSI_v1_940061 | DESP_v1_930004              |
| SecG                                                                 | K337_v1_10735                | PSYM_v1_1410004              | FUSI_v1_690027 | DESP_v1_1070001             |
| SecY                                                                 | K337_v1_10010                | PSYM_v1_110032               | FUSI_v1_940094 | DESP_v1_350007              |
| YidC                                                                 | K337_v1_10153                | PSYM_v1_80033                | FUSI_v1_230014 | DESP_v1_100022              |
| Ffh                                                                  | K337_v1_10560                | PSYM_v1_270001               | FUSI_v1_320018 | DESP_v1_30048               |
| FstY                                                                 | K337_v1_11865                | PSYM_v1_940007               | FUSI_v1_320016 | DESP_v1_20037               |
| <b>Type IV SS</b>                                                    |                              |                              |                |                             |

|                  |                                                         |   |   |   |
|------------------|---------------------------------------------------------|---|---|---|
| VirB2            | K337_v1_20573                                           | - | - | - |
| VirB8            | K337_v1_20574                                           | - | - | - |
| VirB9            | K337_v1_20575                                           | - | - | - |
| VirB10           | K337_v1_20576                                           | - | - | - |
| VirD4            | K337_v1_20580                                           | - | - | - |
| VirB11           | K337_v1_20582                                           | - | - | - |
| VirB3            | K337_v1_20583                                           | - | - | - |
| VirB4            | K337_v1_20584                                           | - | - | - |
| VirB5            | K337_v1_20585                                           | - | - | - |
| VirB6            | K337_v1_20586                                           | - | - | - |
| VirB1            | -                                                       | - | - | - |
| VirB7            | -                                                       | - | - | - |
| <b>Type V SS</b> |                                                         |   |   |   |
| Type Va          | v1_10452; K337_v1_11022;K337_v1/M_v1_90026;PSYM_v1_2620 | - | - | - |
| Type Vb          | K337_v1_11330                                           | - | - | - |
| Type Vc          | v1_11400; K337_v1_11743;K337_v1_                        | - | - | - |
