# Supplementary material for: Anaerobic bacterial degradation of protein and lipid macromolecules in subarctic marine sediment
Source: PubMed Central journal article supplement (PMC8027456; doi:10.1038/s41396-020-00817-6), 2020-11-18
Supplement: 41396_2020_817_MOESM14_ESM.pdf [file 41396_2020_817_MOESM14_ESM.pdf]

**Supplementary Table S6. Summary of additional *Psychromonas* genomes and MAGs, and key annotations for predicted secreted lipases/esterases and peptidases/proteases.**

| Genome                                  | Genbank assembly accession no. | Sequence size (bp) | No. of contigs | GC (%) | Completeness | Contamination | Strain heterogeneity | RAST annotation                                   | PsortB location prediction | CDD domain (NCBI)                                                |
|-----------------------------------------|--------------------------------|--------------------|----------------|--------|--------------|---------------|----------------------|---------------------------------------------------|----------------------------|------------------------------------------------------------------|
| Psychromonas ossibalaenae ATCC BAA-1528 | GCA_000381745                  | 5202369            | 107            | 42     | 100          | 0             | 0                    | peg.1148 Phosphodiesterase/alkaline phosphatase D | Extracellular              | Phosphodiesterase/alkaline phosphatase D, PhoD                   |
|                                         |                                |                    |                |        |              |               |                      | peg.1957 Thermolabile hemolysin precursor         | Extracellular              | SGNH_hydrolase                                                   |
| Psychromonas aquimarina ATCC BAA-1526   | GCA_000428725                  | 5534630            | 141            | 42.5   | 100          | 0             | 0                    | peg.1078 Lipase precursor (EC 3.1.1.3)            | Extracellular              | Triacylglycerol esterase/lipase EstA                             |
|                                         |                                |                    |                |        |              |               |                      | peg.2731 thermolabile hemolysin                   | Extracellular              | GDSL-like Lipase/Acylhydrolase                                   |
|                                         |                                |                    |                |        |              |               |                      | peg.3736 Thermolabile hemolysin precursor         | Extracellular              | Phosphodiesterase/alkaline phosphatase D, PhoD                   |
|                                         |                                |                    |                |        |              |               |                      | peg.3412 Alkaline serine protease                 | Extracellular              | Gluzincin Peptidase family (thermolysin-like proteinases)        |
| Psychromonas ingrahamii 37              | GCA_000015285                  | 4559598            | 1              | 40.1   | 100          | 0.15          | 60                   | peg.3001 Phosphodiesterase/alkaline phosphatase D | Extracellular              | Phosphodiesterase/alkaline phosphatase D, PhoD                   |
|                                         |                                |                    |                |        |              |               |                      | peg.1920 Phospholipase/lecithinase/hemolysin      | Extracellular              | SGNH_hydrolase<br>Phosphodiesterase/alkaline phosphatase D, PhoD |
| Psychromonas arctica DSM 14288          | GCA_000482725                  | 4745897            | 81             | 37.8   | 99.46        | 0.75          | 66.67                | peg.2566 Phosphodiesterase/alkaline phosphatase D | Extracellular              | Phosphodiesterase/alkaline phosphatase D, PhoD                   |
| Psychromonas hadalis ATCC BAA-638       | GCA_000420245                  | 3979980            | 351            | 39.1   | 100          | 0.54          | 0                    | peg.25 peptidase S8 and S53, subtilisin           | Extracellular              | Peptidase S8 family                                              |
| Psychromonas sp. CNPT3                  | GCA_000153405                  | 3052410            | 1              | 38.6   | 100          | 0             | 0                    | peg.2370 Thermolabile hemolysin precursor         | Extracellular              | COG3240 Phospholipase                                            |
| Psychromonas sp. CD1                    | GCA_002239585                  | 1688234            | 3              | 36.9   | 91.98        | 0             | 0                    | peg.1338 Thermolabile hemolysin precursor         | Extracellular              | COG3240 Phospholipase                                            |
| Psychromonas sp. psych-6C06             | GCA_002835465                  | 3719886            | 32             | 39.3   | 100          | 0.09          | 0                    | peg.1896 Vibriolysin, extracellular zinc protease | Extracellular              | Gluzincin Peptidase family (thermolysin-like proteinases)        |
| Psychromonas sp. RZ22                   | GCA_004376845                  | 3069985            | 38             | 35.9   | 100          | 0             | 0                    | .                                                 | .                          | .                                                                |
| Psychromonas sp. SP041                  | GCA_000470315                  | 4801754            | 121            | 36.4   | 100          | 7.21          | 28                   | peg.2919 Phosphodiesterase/alkaline phosphatase D | Extracellular              | Phosphodiesterase/alkaline phosphatase D, PhoD                   |
| Psychromonas sp. RZ5                    | GCA_004378355                  | 3511338            | 116            | 36.7   | 100          | 0.63          | 0                    | .                                                 | .                          | .                                                                |
| Psychromonas sp. Urea-02u-13            | GCA_002835995                  | 4749264            | 320            | 39     | 100          | 0.23          | 83.33                | peg.584 Alkaline serine protease                  | Extracellular              | Zinc-dependent metalloprotease                                   |
| Psychromonas sp. MB-3u-54               | GCA_002836415                  | 4371403            | 186            | 40.8   | 100          | 1.02          | 28.57                | peg. 837 Phospholipase/lecithinase/hemolysin      | Extracellular              | SGNH_hydrolase<br>Phosphodiesterase/alkaline phosphatase D, PhoD |
| Psychromonas sp. B3M02                  | GCA_003318165                  | 3861573            | 156            | 38.4   | 100          | 0             | 0                    | peg.969 Phosphodiesterase/alkaline phosphatase D  | Extracellular              | Phosphodiesterase/alkaline phosphatase D, PhoD                   |
| Psychromonas sp. PRT-SC03               | GCA_001321825                  | 906655             | 210            | 37.1   | 30.45        | 0.86          | 66.67                | None, although incomplete genome                  | .                          | .                                                                |
| Psychromonas sp. MARI                   | GCA_002848885                  | 1487260            | 464            | 36.9   | 84.52        | 2.16          | 40                   | None, although incomplete genome                  | .                          | .                                                                |
